# Supplementary material for: Associations between use of expressed human milk at 2 weeks postpartum and human milk feeding practices to 6 months: a prospective cohort study with vulnerable women in Toronto, Canada
Source: PubMed Central journal article supplement — BMJ Open. 2022 Jun 8;12(6):e055830. doi: 10.1136/bmjopen-2021-055830 (PMC9185489; doi:10.1136/bmjopen-2021-055830), 2022-06-08
Supplement: bmjopen-2021-055830.draft_revisions.pdf [file bmjopen-2021-055830.draft_revisions.pdf]

# BMJ Open

BMJ Open is committed to open peer review. As part of this commitment we make the peer review history of every article we publish publicly available.

When an article is published we post the peer reviewers' comments and the authors' responses online. We also post the versions of the paper that were used during peer review. These are the versions that the peer review comments apply to.

The versions of the paper that follow are the versions that were submitted during the peer review process. They are not the versions of record or the final published versions. They should not be cited or distributed as the published version of this manuscript.

BMJ Open is an open access journal and the full, final, typeset and author-corrected version of record of the manuscript is available on our site with no access controls, subscription charges or pay-per-view fees (<http://bmjopen.bmj.com>).

If you have any questions on BMJ Open's open peer review process please email [info.bmjopen@bmj.com](mailto:info.bmjopen@bmj.com)

# BMJ Open

## Associations between use of expressed human milk at two weeks postpartum and human milk feeding practices to six months: a prospective cohort study with vulnerable women in Toronto, Canada

|                               |                                                                                                                                                                                                                                                                                                                                                                                                                                                                                                                                                                                                                                                                                                                                                                                                                                                                                                                                                                                                                                         |
|-------------------------------|-----------------------------------------------------------------------------------------------------------------------------------------------------------------------------------------------------------------------------------------------------------------------------------------------------------------------------------------------------------------------------------------------------------------------------------------------------------------------------------------------------------------------------------------------------------------------------------------------------------------------------------------------------------------------------------------------------------------------------------------------------------------------------------------------------------------------------------------------------------------------------------------------------------------------------------------------------------------------------------------------------------------------------------------|
| Journal:                      | <i>BMJ Open</i>                                                                                                                                                                                                                                                                                                                                                                                                                                                                                                                                                                                                                                                                                                                                                                                                                                                                                                                                                                                                                         |
| Manuscript ID                 | bmjopen-2021-055830                                                                                                                                                                                                                                                                                                                                                                                                                                                                                                                                                                                                                                                                                                                                                                                                                                                                                                                                                                                                                     |
| Article Type:                 | Original research                                                                                                                                                                                                                                                                                                                                                                                                                                                                                                                                                                                                                                                                                                                                                                                                                                                                                                                                                                                                                       |
| Date Submitted by the Author: | 26-Jul-2021                                                                                                                                                                                                                                                                                                                                                                                                                                                                                                                                                                                                                                                                                                                                                                                                                                                                                                                                                                                                                             |
| Complete List of Authors:     | Mildon, Alison; University of Toronto Temerty Faculty of Medicine, Nutritional Sciences<br>Francis, Jane; University of Toronto Temerty Faculty of Medicine, Nutritional Sciences<br>Stewart, Stacia; Parkdale Queen West Community Health Centre, Health Promotion and Community Engagement<br>Underhill, Bronwyn; Parkdale Queen West Community Health Centre, Health Promotion and Community Engagement<br>Ng, Yi Man; Parkdale Queen West Community Health Centre, Health Promotion and Community Engagement<br>Rousseau, Christina; The Stop Community Food Centre<br>Di Ruggiero, Erica; University of Toronto, Dalla Lana School of Public Health<br>Dennis, CindyLee; University of Toronto, Lawrence S. Bloomberg Faculty of Nursing<br>Kiss, Alex; Sunnybrooke Research Institute, Department of Research Design and Biostatistics<br>O'Connor, Deborah L; University of Toronto Temerty Faculty of Medicine, Nutritional Sciences<br>Sellen, Daniel; University of Toronto Temerty Faculty of Medicine, Nutritional Sciences |
| Keywords:                     | PUBLIC HEALTH, Community child health < PAEDIATRICS, NUTRITION & DIETETICS                                                                                                                                                                                                                                                                                                                                                                                                                                                                                                                                                                                                                                                                                                                                                                                                                                                                                                                                                              |
|                               |                                                                                                                                                                                                                                                                                                                                                                                                                                                                                                                                                                                                                                                                                                                                                                                                                                                                                                                                                                                                                                         |

SCHOLARONE™  
Manuscripts

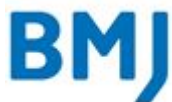

I, the Submitting Author has the right to grant and does grant on behalf of all authors of the Work (as defined in the below author licence), an exclusive licence and/or a non-exclusive licence for contributions from authors who are: i) UK Crown employees; ii) where BMJ has agreed a CC-BY licence shall apply, and/or iii) in accordance with the terms applicable for US Federal Government officers or employees acting as part of their official duties; on a worldwide, perpetual, irrevocable, royalty-free basis to BMJ Publishing Group Ltd ("BMJ") its licensees and where the relevant Journal is co-owned by BMJ to the co-owners of the Journal, to publish the Work in this journal and any other BMJ products and to exploit all rights, as set out in our [licence](#).

The Submitting Author accepts and understands that any supply made under these terms is made by BMJ to the Submitting Author unless you are acting as an employee on behalf of your employer or a postgraduate student of an affiliated institution which is paying any applicable article publishing charge ("APC") for Open Access articles. Where the Submitting Author wishes to make the Work available on an Open Access basis (and intends to pay the relevant APC), the terms of reuse of such Open Access shall be governed by a Creative Commons licence – details of these licences and which [Creative Commons](#) licence will apply to this Work are set out in our licence referred to above.

Other than as permitted in any relevant BMJ Author's Self Archiving Policies, I confirm this Work has not been accepted for publication elsewhere, is not being considered for publication elsewhere and does not duplicate material already published. I confirm all authors consent to publication of this Work and authorise the granting of this licence.

1  
2  
3  
4  
5 Associations between use of expressed human milk at two weeks  
6  
7 postpartum and human milk feeding practices to six months: a  
8  
9 prospective cohort study with vulnerable women in Toronto,  
10  
11  
12 Canada  
13  
14  
15

16 Alison Mildon<sup>1</sup>, Jane Francis<sup>1,2</sup>, Stacia Stewart<sup>3</sup>, Bronwyn Underhill<sup>3</sup>, Yi Man Ng<sup>3</sup>, Christina Rousseau<sup>4</sup>,  
17 Erica Di Ruggiero<sup>5</sup>, Cindy-Lee Dennis<sup>6</sup>, Alex Kiss<sup>7</sup>, Deborah L. O'Connor<sup>1,2,8,9</sup>, Daniel W. Sellen<sup>1,5,8,10</sup>

18  
19 Deborah L. O'Connor, PhD and Daniel W. Sellen, PhD are co-senior authors  
20

21 Alison Mildon ORCID: 0000-0002-5550-0040

22 Jane Francis ORCID: 0000-0001-6676-6533

23 Deborah L. O'Connor ORCID: 0000-0001-6331-091X

24 Daniel W. Sellen ORCID: 0000-0003-2124-6977  
25  
26

27 <sup>1</sup> Nutritional Sciences, Temerty Faculty of Medicine, University of Toronto, Toronto, Ontario, Canada

28 <sup>2</sup> Translational Medicine Program, The Hospital for Sick Children, Toronto, Ontario, Canada

29 <sup>3</sup> Health Promotion and Community Engagement, Parkdale-Queen West Community Health Centre,  
30 Toronto, Ontario, Canada

31 <sup>4</sup> The Stop Community Food Centre, Toronto, Ontario, Canada

32 <sup>5</sup> Dalla Lana School of Public Health, University of Toronto, Toronto, Ontario, Canada

33 <sup>6</sup> Lawrence-Bloomberg Faculty of Nursing, University of Toronto, Toronto, Ontario, Canada

34 <sup>7</sup> Research Design and Biostatistics, Sunnybrook Research Institute, Toronto, Ontario, Canada

35 <sup>8</sup> Joannah and Brian Lawson Centre for Child Nutrition, University of Toronto, Toronto, Ontario, Canada

36 <sup>9</sup> Pediatrics, Sinai Health, Toronto, Ontario, Canada

37 <sup>10</sup> Anthropology, Faculty of Arts and Sciences, University of Toronto, Toronto, Ontario, Canada  
38  
39  
40  
41  
42

43 Address for Correspondence:

44 Prof. Daniel Sellen

45 Department of Nutritional Sciences

46 Temerty Faculty of Medicine, University of Toronto

47 1 King's College Circle, Room 5253A

48 Toronto, Ontario, Canada M5S 1A8

49 Email: dan.sellen@utoronto.ca  
50  
51  
52

53 Word counts:

54 Manuscript: 4170 words

55 Abstract: 299 words  
56  
57  
58  
59  
60

1  
2  
3  
4  
5  
6  
7  
8  
9  
10  
11  
12  
13  
14  
15  
16  
17  
18  
19  
20  
21  
22  
23  
24  
25  
26  
27  
28  
29  
30  
31  
32  
33  
34  
35  
36  
37  
38  
39  
40  
41  
42  
43  
44  
45  
46  
47  
48  
49  
50  
51  
52  
53  
54  
55  
56  
57  
58  
59  
60

For peer review only

1  
2  
3  
4  
5 Associations between use of expressed human milk at two weeks  
6 postpartum and human milk feeding practices to six months: a  
7 prospective cohort study with vulnerable women in Toronto,  
8  
9  
10  
11  
12  
13  
14  
15  
16  
17  
18  
19  
20  
21  
22  
23  
24  
25  
26  
27  
28  
29  
30  
31  
32  
33  
34  
35  
36  
37  
38  
39  
40  
41  
42  
43  
44  
45  
46  
47  
48  
49  
50  
51  
52  
53  
54  
55  
56  
57  
58  
59  
60

# Associations between use of expressed human milk at two weeks postpartum and human milk feeding practices to six months: a prospective cohort study with vulnerable women in Toronto, Canada

## ABSTRACT

**Objectives:** To examine whether use of expressed human milk in the first two weeks postpartum is associated with cessation of human milk feeding and non-exclusive human milk feeding up to six months.

**Design:** pooled data from two prospective cohort studies

**Setting:** three Canada Prenatal Nutrition Program (CPNP) sites serving vulnerable families in Toronto, Canada

**Participants:** 337 registered CPNP clients enrolled prenatally from 2017-2020; 315 (93%) were retained to six months postpartum. Exclusions: pregnancy loss or participation in prior related study; for Study B: preterm birth (<34 weeks); plan to move outside Toronto; not intending to feed human milk; hospitalization of mother or baby at two weeks postpartum.

**Primary and Secondary Outcome Measures:** *Main exposure variable:* any use of expressed human milk at two weeks postpartum. *Outcomes:* cessation of human milk feeding by six months; non-exclusive human milk feeding to four months and six months postpartum.

**Results:** All participants initiated human milk feeding and 80% continued for six months. Exclusive human milk feeding was practiced post-discharge to four months by 28% and to six months by 16%. At two weeks postpartum, 34% reported use of expressed human milk. Any use of expressed human milk at two weeks was associated with cessation of human milk feeding before six months postpartum (aOR

1  
2  
3 2.66; 95% CI: 1.41-5.05) and with non-exclusive human milk feeding to four months (aOR 2.19; 95% CI  
4  
5 1.16-4.14) and six months (aOR 3.65; 95% CI 1.50-8.84).

7 **Conclusions:** Early postpartum use of expressed human milk predicted early cessation and non-exclusive  
8  
9 human milk feeding for four and six months postpartum among vulnerable women living in an urban  
10  
11 Canadian context and accessing community perinatal programs. Further research is needed to  
12  
13 determine whether early use of expressed human milk is a marker of lactation difficulties or undermines  
14  
15 longer-term breastfeeding practices.  
16  
17

18 **Registration:** Clinicaltrials.gov NCT03400605, NCT03589963.

19  
20  
21 **Key words:** human milk, milk expression, lactation, infant feeding  
22  
23

## 24 25 **ARTICLE SUMMARY**

### 26 27 **Strengths and limitations of this study:**

- 28  
29  
30 • This is one of the first studies to examine expressed human milk use by vulnerable women, with  
31  
32 high study retention (93%).
- 33  
34 • Infant feeding data were collected prospectively at 4 time points from two weeks to six months  
35  
36 postpartum, limiting the recall period which improves data accuracy.
- 37  
38 • Analysis of associations between expressed human milk use and later human milk feeding  
39  
40 practices focused on the first two weeks postpartum when lactation is being established.
- 41  
42 • Data collection did not include intentions to pump or feed expressed human milk, reasons for  
43  
44 use of expressed human milk or maternal employment status.
- 45  
46 • Participants were registered in community perinatal programs and 74% had access to free, in-  
47  
48 home skilled lactation support so findings may not be generalizable.  
49  
50  
51  
52  
53  
54  
55  
56  
57  
58  
59  
60

## BACKGROUND

The World Health Organization (WHO) recommendation that all infants receive exclusive human milk (HM) feeding for the first six months of life in order to optimize health and development outcomes is an important global public health goal.[1] The WHO definition does not differentiate between feeding HM directly at the breast and HM expressed either by hand or use of a breast pump and fed to the infant via a cup, bottle or other device.[2] Over the past two decades breast pump use has become widespread in high-income countries and the provision of expressed HM is now a major component of HM feeding for many families with term-born infants.[3-5] Several studies have found high rates of obtaining pumps by the early postpartum period including use of expressed HM during the hospital stay.[4, 6, 7] However, there is growing evidence that expressed HM is not equivalent to HM obtained through direct feeding at the breast. Observational studies with large sample sizes have found that provision of expressed HM but no formula is associated with higher risks of otitis media, wheezing and rapid weight gain within the first year of life in comparison to exclusive feeding at the breast.[8-10] These findings have prompted the call for more nuanced assessment of HM feeding practices to include data on pumping and use of expressed HM.[11, 12]

In addition to concerns about health effects, use of expressed HM feeding has been associated with shorter duration of any and exclusive HM feeding, although findings are mixed.[13] It is likely that this inconsistency relates to variations between studies in factors such as infant age at the start of pumping or expressed HM feeding, and reasons for providing and degree of reliance on expressed HM. Recent analyses of longitudinal prospective cohort studies have found that pumping and/or expressed HM feeding earlier in the postpartum period, for non-elective reasons (ie. to manage difficulties feeding at the breast or return to work) and with higher frequency is associated with early cessation of any and exclusive HM feeding.[7, 14-16] However, the samples in these studies tend to be biased towards



1  
2  
3 women of higher-socioeconomic status so may not reflect expressed HM feeding practices of more  
4  
5 vulnerable women.  
6

7  
8 In this paper we report expressed HM feeding practices and associated HM feeding outcomes  
9  
10 over the first six months postpartum among women with term-born infants recruited through the  
11  
12 Canada Prenatal Nutrition Program (CPNP; a national program designed to serve socially and/or  
13  
14 economically vulnerable women) at three sites in Toronto. Our objectives were to examine: i) the  
15  
16 prevalence of expressed HM use at two weeks and two, four and six months postpartum; and ii)  
17  
18 associations between use of expressed HM at two weeks and HM feeding outcomes (cessation before  
19  
20 six months and non-exclusive HM feeding to four and six months postpartum).  
21  
22

## 23 24 **METHODS**

### 25 26 27 **Study setting and participants**

28  
29  
30 This analysis utilizes infant feeding data collected prospectively from birth mothers in two  
31  
32 studies conducted within a research program designed to examine the potential for delivering postnatal  
33  
34 lactation support through the CPNP. The CPNP is a federally funded initiative implemented through  
35  
36 community agencies with the aims of improving birth outcomes and HM feeding in vulnerable Canadian  
37  
38 families.[17] CPNP activities vary between sites based on local needs and available partnerships, but are  
39  
40 usually implemented as weekly drop-in programs. Core services include group health and nutrition  
41  
42 education, provision of food and/or grocery vouchers, individual supports such as nutrition counseling,  
43  
44 and referrals to other community services.[17]  
45  
46

47  
48 Participants in both studies were registered in the CPNP at one of three specific sites in Toronto,  
49  
50 Canada, and were recruited prenatally. The population of the combined catchment areas of the three  
51  
52 CPNP sites is over 180,000. Detailed methods for both studies have been published previously. Study A  
53  
54 was a prospective cohort study of infant feeding practices among clients of a CPNP site offering skilled  
55  
56  
57  
58  
59  
60

1  
2  
3 postnatal lactation support with additional charitable funding from The Sprott Foundation.[18] Study B  
4 was a pre/post intervention study designed to examine the effectiveness of implementing similar  
5  
6 lactation support services in two other CPNP sites.[19] Inclusion criteria were prenatal registration in  
7  
8 one of the CPNP sites, and for Study B, intention to feed human milk and to continue living in Toronto  
9  
10 with the infant. Exclusion criteria were pregnancy loss and for Study A, participation in a prior related  
11  
12 study. Exclusion criteria for Study B were preterm birth (<34 weeks gestation), medical issue affecting  
13  
14 feeding and hospitalization of either the mother or infant at two weeks postpartum. Recruitment was  
15  
16 conducted from August 2017-January 2020 for Study A and from November 2018-March 2020 for Study  
17  
18 B. Due to the COVID-19 pandemic, Study B was suspended in March 2020 following a brief intervention  
19  
20 period and incomplete recruitment of the post-intervention group, but data collection was completed  
21  
22 with all enrolled participants.  
23  
24  
25  
26

27  
28 All participants in Study A and those recruited to the post-intervention group in Study B had  
29  
30 access to two free, in-home visits from an International Board Certified Lactation Consultant (IBCLC) for  
31  
32 postpartum lactation support, with additional visits approved for complex needs. This service was  
33  
34 promoted prenatally and offered pro-actively by telephone call around the time of birth. Double-  
35  
36 electric breast pumps were provided by the IBCLCs as needed, but criteria for pump provision were  
37  
38 more flexible for Study A participants as the lactation support was provided as a community program  
39  
40 rather than a research intervention.  
41  
42  
43

## 44 **Patient and public involvement statement**

45  
46 Participants in this study were not clinical patients but clients of community perinatal services.  
47  
48 At the time of the study, no engagement committee existed for these service-users to inform the  
49  
50 research. The community programs had participant feedback mechanisms in place regarding service  
51  
52 delivery. Community program staff were directly involved in the design, implementation, interpretation  
53  
54 of findings and reporting of this research, including contributing service-user perspectives.  
55  
56  
57  
58  
59  
60

## Data collection

All data collection for Study A was conducted by JF and for Study B by AM or a Mandarin speaking research assistant. Data collection occurred either in person at the participating CPNP sites or by telephone. Professional interpreter services were used for Study A participants who did not speak English (n=14) and Study B participants who did not speak either English or Mandarin (n=20).

In Studies A and B, infant feeding data were collected prospectively at two weeks and two, four and six months postpartum using the same standardized and validated interviewer-administered questionnaire used previously by our group.[20, 21] In Study B, data were also collected at postpartum months one, three and five, but only the time points shared with Study A are reported here. At each time point, participants reported the average number of milk feeds provided to their infant per 24 hours, divided into feeds at the breast, expressed HM feeds and formula feeds. Expressed HM or formula use as a top-up after feeding at the breast was recorded as well as provision of other liquids and introduction of solids. The recall period was two weeks. Infant sex and in-hospital formula supplementation (yes/no) were recorded at the first postpartum contact. Participants who stopped all HM feeding were asked to recall the last date they provided any HM to their infant and main reasons for cessation.

Participants were categorized as yes or no for any HM feeding, exclusive HM feeding and any expressed HM feeding at each postpartum time point. Exclusive HM feeding was defined as provision of HM only, either at the breast or expressed, with the exception of vitamins, medicines and infrequent (less than daily) water feeds. In accordance with WHO and Health Canada guidance to introduce solids 'around' six months postpartum, participants who introduced solids up to 14 days prior to six months but otherwise provided only HM were classified as exclusively HM feeding at six months postpartum.[1, 22] Participants who were exclusively HM feeding at two weeks, two months and four months were classified as practicing exclusive HM feeding post-discharge to four months, and those who were also

1  
2  
3 exclusively HM feeding at six months were classified as practicing exclusive HM feeding post-discharge  
4 to six months. Hospital formula supplementation (yes/ no) was considered an independent predictor of  
5  
6 HM feeding outcomes.[23]  
7  
8

9  
10 Maternal socio-demographic data were collected via interviewer-administered questionnaire  
11 prenatally in Study B and at two weeks postpartum in Study A. Socio-demographics included maternal  
12 age (years); parity (primiparous, multiparous); education level (high school or less, post-secondary);  
13 length of time in Canada (<1 year, 1 to <3 years,  $\geq$ 3 years, born in Canada); and ethnicity. Participants  
14 self-reported their ethnicity using a standardized list of geographically-based options developed and  
15 validated for a large birth cohort study based in Toronto.[24] Based on the distribution of responses to  
16 the list of geographically-based ethnicities, five categories were defined for analysis (East Asian, Other  
17 Asian, African, Latin American, and European/Caribbean/Other).  
18  
19  
20  
21  
22  
23  
24  
25  
26

27  
28 In Study A, household income was assessed at two weeks postpartum and classified as above or  
29 below the Statistics Canada size-adjusted Low Income Cut-Off.[25] In Study B, household income  
30 adequacy was assessed at six months postpartum and classified as meeting all, most, some, very little or  
31 none of regular household expenses, using standardized questions from Statistics Canada's Employment  
32 Insurance Coverage Survey.[26] Participants in Study B were also asked about receipt of federal  
33 Employment Insurance maternity leave benefits (yes/no). In both studies, food insecurity was assessed  
34 at six months postpartum using the Household Food Security Survey Module of the Canadian  
35 Community Health Survey, and classified as none, marginal, moderate, severe based on the number of  
36 affirmative responses.[27, 28]  
37  
38  
39  
40  
41  
42  
43  
44  
45  
46

47  
48 Receipt of the IBCLC services (yes/no) and number of IBCLC visits (0, 1, >1) was recorded from  
49 CPNP site records for Study A participants and from research records of eligible Study B participants.  
50 Although some participants received breast pumps through the IBCLCs, we did not collect data on the  
51 use of these pumps or participants' access to pumps through other sources.  
52  
53  
54  
55  
56  
57  
58  
59  
60

1  
2  
3 In Study B only, the Breastfeeding Self-Efficacy Scale-Short Form was administered at two weeks  
4  
5 postpartum.[29] This is a validated and widely used 14-item scale which produces a score from 14-70,  
6  
7 with higher scores indicating greater breastfeeding self-efficacy.  
8  
9

## 10 **Statistical analysis**

11  
12  
13 Descriptive statistics were calculated for all variables of interest. Continuous measures such as  
14  
15 age were summarized using means and standard deviations whereas categorical measures were  
16  
17 summarized using counts and percentages. For Study B only, a t-test was used to compare mean  
18  
19 breastfeeding self-efficacy scores between participants who did and did not use expressed HM at two  
20  
21 weeks postpartum.  
22  
23

24 Associations between any expressed HM use at two weeks postpartum and HM feeding  
25  
26 outcomes were first assessed by chi-square tests then studied further using multivariable logistic  
27  
28 regression analysis. Participants with data for all exposure variables and the outcome measure were  
29  
30 included each model. Outcome measures were: i) cessation of any HM feeding before six months  
31  
32 postpartum; ii) non-exclusive HM feeding post-discharge to four months postpartum; and iii) non-  
33  
34 exclusive HM feeding post-discharge to six months postpartum. The global recommendation is exclusive  
35  
36 HM feeding for six months,[1] but a separate analysis of Study B data showed that this practice was  
37  
38 frequently compromised after four months by introduction of solids and non-formula fluids.[30] We  
39  
40 therefore assessed non-exclusive HM feeding to both four and six months in order to examine  
41  
42 associations with and without the influence of complementary feeding.  
43  
44  
45

46  
47 Potential exposure variables considered for inclusion in the multivariable logistic regression  
48  
49 analysis were: maternal age, education level, parity, years in Canada, geographically-based ethnicity,  
50  
51 infant sex, any household food insecurity, household food insecurity category, hospital formula  
52  
53 supplementation, and access to IBCLC services through the CPNP. Each potential variable was first  
54  
55 assessed in bivariate screening for its association with each outcome, using chi-square tests for  
56  
57  
58  
59  
60

1  
2  
3 categorical variables and t-tests for continuous variables. Variables with p-values less than 0.15 in  
4  
5 bivariate screening were included in the multivariable logistic regression models for each outcome.  
6  
7 Prior to modeling, multicollinearity was assessed using tolerance statistics. A tolerance value of <0.4  
8  
9 was used as the cut-point for the presence of multicollinearity. In such cases, only one member of a  
10  
11 correlated set would be retained for the multivariable model.  
12  
13

14 The models were developed to meet the statistical requirements for the number of covariates in  
15  
16 a valid logistic regression model. If the model did not have numerical tolerance for all identified  
17  
18 covariates, those deemed most relevant to the objective and with lowest p-values were retained.  
19  
20 Model fit was assessed using the Hosmer-Lemeshow goodness-of-fit test and area under the curve.  
21  
22 Results are presented using odds ratios and their associated 95% confidence intervals.  
23  
24

25 We also conducted an exploratory analysis with the subsample of participants who had access  
26  
27 to IBCLC services through the CPNP sites. We followed the procedures described above to assess the  
28  
29 effect of receiving IBCLC visits on the association between expressed HM use at two weeks postpartum  
30  
31 and HM feeding outcomes. In addition to the potential exposure variables noted above, bivariate  
32  
33 screening included the number of IBCLC visits received (0, 1 or >1) and multivariable logistic regression  
34  
35 models tested for the interaction between expressed HM use and the number of IBCLC visits. If the  
36  
37 interaction was not significant, the interaction term was removed and the model rerun.  
38  
39  
40

41 All statistical analyses were performed using IBM SPSS Statistics for Windows, version 26 (IBM  
42  
43 Corp., Armonk, N.Y., USA).  
44  
45

## 46 RESULTS

47  
48

49 There were 287 potential participants for Study A and 215 for Study B, of whom 337 were  
50  
51 enrolled and 331 provided infant feeding data (Fig. 1). Study retention was high (93%), and 315  
52  
53 participants provided data on expressed HM feeding at six months postpartum. Fourteen participants  
54  
55 attended more than one CPNP site and enrolled in both studies simultaneously, and three participants  
56  
57  
58  
59  
60

enrolled in both studies but for separate pregnancies. Only the Study A record was retained for each of these participants in the pooled dataset, in order to account for their access to IBCLC services. The mean age of participants was 32 years, the majority (66%) had post-secondary education and 50% were primiparous (Table 1). Ethnic diversity was high in our sample, and 91% of participants were immigrants to Canada, with 38% having lived in Canada for less than three years. Nearly half (44%) reported household food insecurity.

**Table 1.** Participant characteristics

| Characteristic                                                                                  | Indicator                                                                               | n (%)                                                                 |
|-------------------------------------------------------------------------------------------------|-----------------------------------------------------------------------------------------|-----------------------------------------------------------------------|
| Age<br>(N=330)                                                                                  | mean age (SD): 31.9 years (4.9)                                                         |                                                                       |
| Education<br>(N=331)                                                                            | ≤ high school<br>post-secondary                                                         | 113 (34.1)<br>218 (65.9)                                              |
| Parity<br>(N=330)                                                                               | primiparous<br>multiparous                                                              | 167 (50.6)<br>163 (49.4)                                              |
| Newcomer status<br>(N=331)                                                                      | <1 year in Canada<br>1 to <3 years in Canada<br>≥3 years in Canada<br>born in Canada    | 46 (13.9)<br>80 (24.2)<br>175 (52.9)<br>30 (9.1)                      |
| Ethnicity<br>(N=326)                                                                            | East Asian<br>Other Asian<br>African<br>Latin American<br>European/Caribbean/Other      | 129 (39.6)<br>51 (15.6)<br>42 (12.9)<br>59 (18.1)<br>45 (13.8)        |
| Infant sex<br>(N=331)                                                                           | male<br>female                                                                          | 176 (53.2)<br>155 (46.8)                                              |
| Household food security<br>(N=316)                                                              | secure<br>marginal insecurity<br>moderate insecurity<br>severe insecurity               | 176 (55.7)<br>31 (9.8)<br>74 (23.4)<br>35 (11.1)                      |
| Household income<br>(Study A only; N=197)                                                       | below Low Income Cut-Off<br>above Low Income Cut-Off<br>don't know/prefer not to answer | 108 (54.8)<br>71 (36.0)<br>18 (9.1)                                   |
| Proportion of regular expenses<br>met by household income <sup>a</sup><br>(Study B only; N=124) | all<br>most<br>some<br>very little<br>none<br>don't know/prefer not to answer           | 60 (48.4)<br>30 (24.2)<br>21 (16.9)<br>10 (8.1)<br>1 (0.8)<br>2 (1.6) |

|                                                                     |                                 |           |
|---------------------------------------------------------------------|---------------------------------|-----------|
| Receipt of maternity benefits <sup>b</sup><br>(Study B only; N=124) | no                              | 85 (68.5) |
|                                                                     | yes                             | 38 (30.6) |
|                                                                     | don't know/prefer not to answer | 1 (0.1)   |

<sup>a</sup>Categorical variable from Statistics Canada Employment Insurance Coverage Survey, used to assess household income adequacy to meet regular expenses during the first six months postpartum. <sup>b</sup>Categorical variable used to assess receipt of maternity benefits through the federal Employment Insurance program, which has eligibility criteria based on prior employment.

All participants initiated HM feeding but in-hospital formula supplementation was common (57%) (Table 2). Eighty per cent of participants continued feeding HM for at least six months but exclusivity was low. Of the total sample, only 28% practiced exclusive HM feeding post-discharge to four months, and 16% to six months. Nearly three-quarters of all study participants had access to IBCLC services through the CPNP sites. Of these, 72% used the service, with 36% receiving one visit, 30% receiving two visits, and 6% receiving more than two visits.

**Table 2.** Infant feeding practices and utilization of IBCLC services (N=333)

| Indicator                                                | n (%)       |
|----------------------------------------------------------|-------------|
| Initiated human milk feeding                             | 333 (100.0) |
| Infant received formula in hospital (N=325)              | 186 (57.2)  |
| Continued human milk feeding for 6 months (N=323)        | 257 (79.6)  |
| Exclusively fed human milk for at least 4 months (N=320) | 91 (28.4)   |
| Exclusively fed human milk for 6 months (N=322)          | 52 (16.1)   |
| Access to IBCLC services through the CPNP                | 245 (73.6)  |
| Received ≥1 IBCLC visit (N=245)                          | 177 (72.2)  |

IBCLC=International Board Certified Lactation Consultant. CPNP=Canada Prenatal Nutrition Program.

At two weeks postpartum, 34% of participants reported using expressed HM (Table 3). The frequency dropped at each subsequent data collection point to 8% at six months. Nine participants (3%) provided expressed HM at all time points, while 49% never provided expressed HM. Most participants who provided expressed HM used it for at least one daily feed at all time points (75% at 2 weeks, 78% at 2 and 4 months, and 69% at 6 months). The provision of expressed HM as a top-up to feeds at the



breast was greatest at two weeks postpartum (6%), and by six months only one participant was using expressed HM in this way (Table 3).

**Table 3.** Expressed human milk feeding practices

| Time Point               | any expressed HM<br>n (%) | daily expressed HM feeds<br>n (%) | occasional expressed HM feeds<br>n (%) | daily expressed HM top-ups<br>n (%) |
|--------------------------|---------------------------|-----------------------------------|----------------------------------------|-------------------------------------|
| <b>2 weeks</b><br>N=317  | 107 (33.8)                | 80 (25.5)                         | 7 (2.2)                                | 20 (6.4)                            |
| <b>2 months</b><br>N=319 | 79 (24.8)                 | 62 (19.4)                         | 11 (3.4)                               | 7 (2.2)                             |
| <b>4 months</b><br>N=319 | 46 (14.4)                 | 36 (11.3)                         | 7 (2.2)                                | 4 (1.3)                             |
| <b>6 months</b><br>N=315 | 26 (8.3)                  | 18 (5.7)                          | 7 (2.2)                                | 1 (0.3)                             |

HM=human milk. Occasional=less than daily frequency. Top-ups=expressed HM provided immediately after feeding at the breast. Note: both daily expressed HM feeds and top-ups to were provided by 3 participants at 2 weeks and by 1 participant at 2 months.

For Study B participants (n=112), the mean breastfeeding self-efficacy score at two weeks postpartum was significantly lower among those using expressed HM [mean (Standard Deviation): 47.8 (13.6) vs. 58.6 (10.6);  $p<0.001$ ].

Table 4 presents the associations between any use of expressed HM at two weeks postpartum and HM feeding outcomes. All multivariable regression models demonstrated goodness-of-fit based on the Hosmer-Lemeshow test ( $p>0.05$ ) and area under the curve ( $>0.7$ ). In the adjusted analyses, expressed HM use at two weeks postpartum was associated with cessation of HM feeding before six months (OR 2.66; 95% CI: 1.41-5.05) and with non-exclusive HM feeding to four months (OR 2.19; 95% CI: 1.16-4.14) and to six months (OR 3.65; 95% CI: 1.50-8.84). In-hospital formula supplementation was also associated with cessation of HM feeding before six months (OR 2.37; 95% CI 1.16-4.84) and non-exclusive HM feeding to four months (OR 4.46; 95% CI 2.47-8.02) and six months (OR 3.45; 95% CI 1.67-7.15). Other variables significantly associated with cessation of HM feeding were multiparity (OR 2.52; 95% CI 1.31-4.86), not having access to IBCLC visits through the CPNP (OR 2.21; 95% CI 1.08-4.52)

and ethnicity ( $p=0.02$ ). Participants of self-reported African origin were least likely to stop HM feeding before six months postpartum in comparison with all other ethnicity categories (Supplemental File 1).

Ethnicity was not associated with exclusivity of HM feeding but education below post-secondary was associated with non-exclusive HM feeding for six months (OR 2.48; 95% CI 1.11-5.52).

**Table 4.** Multivariable logistic regression results: associations between expressed human milk use at two weeks postpartum and human milk feeding outcomes

| Model | Outcome<br>(sample size for unadjusted; adjusted)                                 | Odds Ratio (95% Confidence Intervals) |         |                  |         |
|-------|-----------------------------------------------------------------------------------|---------------------------------------|---------|------------------|---------|
|       |                                                                                   | Unadjusted                            | p-value | Adjusted         | p-value |
| 1     | Cessation before 6 months<br>(N=309; N=296)                                       | 3.01 (1.69-5.35)                      | <0.001  | 2.66 (1.41-5.05) | 0.003   |
| 2     | Non-exclusive human milk<br>feeding post-discharge for 4<br>months (N=311; N=300) | 2.70 (1.51-4.84)                      | 0.001   | 2.19 (1.16-4.14) | 0.016   |
| 3     | Non-exclusive human milk<br>feeding post-discharge for 6<br>months (N=310; N=299) | 4.00 (1.74-9.23)                      | 0.001   | 3.65 (1.50-8.84) | 0.004   |

IBCLC=International Board Certified Lactation Consultant. Model 1 adjusted for parity, hospital formula, ethnicity and access to IBCLC services; Model 2 adjusted for hospital formula and ethnicity; Model 3 adjusted for hospital formula, ethnicity and post-secondary education.

In the subsample of participants with access to IBCLC services through the CPNP sites, expressed HM use at two weeks was associated with HM feeding cessation (OR 4.66; 95% CI 2.10-10.34) and non-exclusive HM feeding to six months (OR 3.44; 95% CI 1.12-10.61) in the multivariable regression models (Table 5). There was also an association with non-exclusive HM feeding to four months in unadjusted analysis but significance was not retained in the adjusted model (OR 1.50; 95% CI 0.69-3.28). There was no significant interaction between the number of IBCLC visits and use of expressed HM at two weeks postpartum in any of the models. However, not receiving an IBCLC visit compared with receipt of either 1 or >1 visit was an independent predictor of HM feeding cessation ( $p=0.003$ ). Receipt of >1 IBCLC visit compared with 1 visit was associated with non-exclusive HM feeding for six months (OR 3.74; 95% CI 1.35-10.31). These models demonstrated goodness-of-fit based on the Hosmer-Lemeshow test ( $p>0.05$ ) and area under the curve (>0.7).

**Table 5.** Multivariable logistic regression results: associations between expressed human milk use at two weeks postpartum and human milk feeding outcomes in the subsample with access to IBCLC services through the CPNP

| Model | Outcome<br>(sample size for unadjusted; adjusted)                                 | Odds Ratio (95% Confidence Intervals) |              |                   |                  |
|-------|-----------------------------------------------------------------------------------|---------------------------------------|--------------|-------------------|------------------|
|       |                                                                                   | Unadjusted                            | p-value      | Adjusted          | p-value          |
| 4     | Cessation before 6 months<br>(N=234; N=231)                                       | 2.87 (1.43-5.74)                      | <b>0.003</b> | 4.66 (2.10-10.34) | <b>&lt;0.001</b> |
| 5     | Non-exclusive human milk<br>feeding post-discharge for 4<br>months (N=233; N=223) | 2.15 (1.08-4.27)                      | <b>0.028</b> | 1.50 (0.69-3.28)  | 0.305            |
| 6     | Non-exclusive human milk<br>feeding post-discharge for 6<br>months (N=234; N=229) | 4.55 (1.55-13.36)                     | <b>0.006</b> | 3.44 (1.12-10.61) | <b>0.031</b>     |

IBCLC=International Board Certified Lactation Consultant. Model 4 adjusted for parity and number of IBCLC visits; Model 5 adjusted for hospital formula, ethnicity and number of IBCLC visits; Model 6 adjusted for hospital formula and number of IBCLC visits.

## DISCUSSION

In this prospective study, expressed HM use was common in a multi-ethnic cohort of socially and economically vulnerable women, with the highest prevalence at two weeks postpartum (34%). In adjusted analysis, use of expressed HM at two weeks postpartum, regardless of the intensity of use, was associated with cessation of any HM feeding before six months and with non-exclusive HM feeding to both four and six months postpartum. These findings demonstrate that early postpartum use of expressed HM may not support longer-term recommended HM feeding practices.

There are few prior studies examining the association between early postpartum expressed HM use and later HM feeding practices, and differences in study methods limit comparability. In an Australian cohort study, 46% of participants (n=914) provided expressed HM during the postpartum hospital stay; in adjusted analysis, not feeding exclusively at the breast in the first 24-48 hours predicted cessation of any and exclusive HM feeding before six months, but the specific association between expressed HM feeding and later practices was not assessed.[6] In an American study (n=946), expressing HM within the first three weeks postpartum predicted HM feeding cessation by 12 weeks, while pumping after three weeks was protective of continued HM feeding.[31] A pooled analysis of two

1  
2  
3 cohort studies in Hong Kong (n=2450) found that only exclusive use of expressed HM at one month  
4  
5 postpartum predicted cessation of any HM feeding before six months, and did not find a significant  
6  
7 association with exclusive HM feeding in the adjusted analysis.[16] However, “exclusive expressed HM”  
8  
9 was determined by the proportion of HM feeds, not all feeds, that were expressed HM, and use of  
10  
11 formula or other milks was not reported. In addition, by one month postpartum, 35% of the sample had  
12  
13 already stopped any HM feeding and were not included in the analysis.  
14  
15

16  
17       Secondary analyses of the Infant Feeding Practices Study II in the United States found that  
18  
19 pumping before 1.5 months postpartum, regularly, and for non-elective reasons (such as difficulties  
20  
21 feeding at the breast or return to work) increased the risk of cessation of both any and exclusive HM  
22  
23 feeding.[14, 15] We did not collect data on reasons for expressed HM use, but based on the patterns we  
24  
25 observed, we hypothesize that our findings reflect the use of expressed HM as a strategy to manage the  
26  
27 early stages of lactation and suggest it may be a marker of difficulties feeding at the breast. This aligns  
28  
29 with our finding that breastfeeding self-efficacy scores were significantly lower among Study B  
30  
31 participants using expressed HM at two weeks postpartum. Other studies have found difficulties  
32  
33 feeding at the breast and concerns about milk supply to be commonly reported reasons for expressed  
34  
35 HM use during the hospital stay,[6, 32] and up to 4.5 months postpartum.[3, 4, 33] These are also the  
36  
37 most common reasons reported for early cessation of any and exclusive HM feeding.[34, 35] Using  
38  
39 expressed HM to address early lactation concerns may result in disruption to the establishment of a full  
40  
41 milk supply, which relies on frequent suckling and effective milk removal by the infant.[36] Use of a high  
42  
43 quality breast pump which mimics infant suckling may assist in this process, but this requires frequent  
44  
45 pumping sessions with full drainage of the breasts.[36] We also found that, in addition to expressed HM  
46  
47 use, in-hospital formula supplementation and not having access to IBCLC services through the CPNP  
48  
49 predicted early cessation of HM feeding in our cohort.  
50  
51  
52  
53  
54  
55  
56  
57  
58  
59  
60

1  
2  
3 Taken together, these findings reinforce long-standing guidance on the need for both hospitals  
4 and community services to support women to successfully establish and maintain lactation through  
5 prenatal preparation, access to skilled lactation support from birth, enhanced breastfeeding self-efficacy  
6 and maternal mental health care.[32, 37-40]. These findings also suggest that breast pump provision  
7 should be embedded within a larger framework of lactation education and skilled support to avoid or  
8 reduce potential unintended negative influences on continued HM feeding. Explicit information on the  
9 benefits and risks of pumping is currently lacking in Canadian infant feeding guidelines.[22]

10  
11  
12  
13  
14  
15  
16  
17  
18  
19 The findings have implications for strengthening the specific programs that provided the context  
20 for this study, and beyond. Three-quarters of participants had access to free, in-home IBCLC visits for  
21 postpartum lactation support and 72% of these did receive at least one visit. The results suggest this  
22 specific localized intervention could be strengthened through greater focus on the establishment of  
23 lactation, including prenatal preparation.[41] Maternal mental health care is also critical in this study  
24 population, as immigrant women are at higher risk of postpartum depression.[42]

## 32 33 **Strengths and limitations**

34  
35  
36  
37  
38  
39  
40  
41  
42  
43  
44  
45  
46  
47  
48  
49  
50  
51  
52  
53  
54  
55  
56  
57  
58  
59  
60  
Strengths of this study include prospective data collection at multiple time points over the first  
six months postpartum with a short recall period to improve data accuracy.[43] Data collection included  
the proportion of feeds that were expressed HM and the use of expressed HM as a top-up to feeding at  
the breast, which provide more nuanced understanding of expressed HM feeding practices. There were  
high recruitment and retention rates in both Study A and B, which we attribute to the embeddedness of  
the lead researchers (AM and JF) in the weekly CPNP programs, which helped build trust and rapport  
with vulnerable study participants.[44]

A limitation is that we did not collect data on pump ownership or use, which are needed for a  
full understanding of HM production and feeding practices.[45] We also did not assess participants'  
intentions regarding pump use or expressed HM feeding, reasons for providing expressed HM,

1  
2  
3 experiences with lactation difficulties in the early postpartum period or employment status. Inclusion of  
4 these data is recommended for future studies. We were unable to include income or breastfeeding self-  
5 efficacy as potential covariates in our regression analyses as these data were not collected consistently  
6 between the two studies. The multivariable regression models assessing associations with HM feeding  
7 cessation and non-exclusive HM feeding for six months did not have room for all potential predictors  
8 identified in bivariate screening, while few predictors were identified for non-exclusive HM feeding for  
9 four months. Thus, we may not have identified or included all relevant covariates, although all models  
10 demonstrated goodness-of-fit. The findings are not generalizable to other CPNP sites or to the  
11 population in general, and all data were self-reported by participants. This introduces risk of recall and  
12 social desirability biases, which may have resulted in higher than actual rates of any and exclusive HM  
13 feeding. These biases were mitigated through the use of prospective data collection with a short recall  
14 period, rapport building with participants and collecting data on all infant feeding practices, not just HM.

## 31 CONCLUSION

32  
33  
34 In a multi-ethnic cohort of vulnerable women attending the CPNP at three sites in Toronto,  
35 expressed HM use was highest at two weeks postpartum, and this was associated with increased risk of  
36 early HM feeding cessation and non-exclusive HM feeding for four and six months postpartum. These  
37 findings suggest that feeding expressed HM in the early postpartum period may be a marker of lactation  
38 difficulties, but further research is needed to confirm this. The majority of study participants had access  
39 to free, in-home IBCLC visits through the participating CPNP sites, and this study provides insights to  
40 strengthen and tailor this intervention. A greater focus on prenatal preparation for lactation and access  
41 to skilled lactation support in the immediate postpartum period is recommended to assist in the  
42 establishment of effective feeding at the breast and to build breastfeeding self-efficacy in order to  
43 enable women to achieve their HM feeding goals.  
44  
45  
46  
47  
48  
49  
50  
51  
52  
53  
54  
55  
56  
57  
58  
59  
60

## Author contributions

AM contributed to the design and conceptualization of the work, led implementation and data collection for Study B, conducted primary data analysis for this work, drafted the manuscript and finalized it for submission. JF contributed to the design and conceptualization of the work, led implementation and data collection for Study A, assisted with data analysis for this work and critically reviewed the manuscript. SS, BU, YN and CR facilitated the integration of research activities into the community CPNP programs and critically reviewed the manuscript. EDR contributed to the design and conceptualization of the work, including the designs of both Study A and B, and critically reviewed the manuscript. CLD contributed to the design and conceptualization of the work, including the design of Study B, and critically reviewed the manuscript. AK provided oversight to the statistical analysis and critically reviewed the manuscript. DLO and DWS gave oversight to the design and conceptualization of the study and to Study A and B, provided support for data collection and analysis, and critically reviewed the manuscript. All authors gave final approval of the manuscript.

## Competing Interests

None declared.

## Acknowledgements

The authors gratefully acknowledge the contribution of all study participants, and Yiqin Mao and Stephanie Zhang for their assistance with recruitment and data collection.

## Funding

This work was supported by a Canadian Institutes of Health Research Doctoral Research Award (#GSD-157928) to AM, and by The Sprott Foundation and the Joannah and Brian Lawson Centre for Child

1  
2  
3 Nutrition. The graduate student stipend of JF was supported by an Ontario Graduate Scholarship and  
4 Peterborough K.M. Hunter Charitable Foundation Graduate Award. The funders had no role in the study  
5 design, data analysis, interpretation or drafting of the manuscript.  
6  
7  
8  
9

## 10 Data sharing

11  
12 The datasets generated and/or analyzed for this study are not publicly available in order to  
13 protect participant anonymity and confidentiality.  
14  
15  
16  
17

## 18 Ethics statement

19  
20 Ethics approval was obtained for Studies A and B from the Office of Research Ethics at the  
21 University of Toronto (protocol #34482 and #35845, respectively). Study B was also approved by the  
22 Research Ethics Board of Toronto Public Health (#2018-11). All participants provided written informed  
23 consent to participate.  
24  
25  
26  
27  
28  
29  
30

## 31 REFERENCES

- 32  
33  
34 1. World Health Organization. Global strategy for infant and young child feeding. Geneva: WHO, 2003.  
35 Available: [http://www.who.int/nutrition/publications/gs\\_infant\\_feeding\\_text\\_eng.pdf](http://www.who.int/nutrition/publications/gs_infant_feeding_text_eng.pdf)  
36 [Accessed 9 Nov 2016].  
37  
38 2. World Health Organization. Indicators for assessing infant and young child feeding practices:  
39 definitions and measurement methods. Geneva: WHO, 2021. Available:  
40 <https://www.who.int/publications/i/item/9789240018389> [Accessed April 22, 2021].  
41  
42 3. Labiner-Wolfe J, Fein SB, Shealy KR, et al. Prevalence of breast milk expression and associated factors.  
43 *Pediatrics* 2008;122 Suppl 2:S63-8. doi: 10.1542/peds.2008-1315h  
44  
45 4. Fan HSL, Fong DYT, Lok KYW, et al. Expressed breast milk feeding practices in Hong Kong Chinese  
46 women: A descriptive study. *Midwifery* 2020;91:102835. doi: 10.1016/j.midw.2020.102835  
47  
48 5. Binns CW, Win NN, Zhao Y, et al. Trends in the expression of breastmilk 1993-2003. *Breastfeeding*  
49 *Review* 2006;14(3):5-9.  
50  
51 6. Forster DA, Johns HM, McLachlan HL, et al. Feeding infants directly at the breast during the  
52 postpartum hospital stay is associated with increased breastfeeding at 6 months postpartum: a  
53 prospective cohort study. *BMJ Open* 2015;5(5):e007512. doi: 10.1136/bmjopen-2014-007512  
54  
55  
56  
57  
58  
59  
60



- 1
  - 2
  - 3
  - 4
  - 5
  - 6
  - 7
  - 8
  - 9
  - 10
  - 11
  - 12
  - 13
  - 14
  - 15
  - 16
  - 17
  - 18
  - 19
  - 20
  - 21
  - 22
  - 23
  - 24
  - 25
  - 26
  - 27
  - 28
  - 29
  - 30
  - 31
  - 32
  - 33
  - 34
  - 35
  - 36
  - 37
  - 38
  - 39
  - 40
  - 41
  - 42
  - 43
  - 44
  - 45
  - 46
  - 47
  - 48
  - 49
  - 50
  - 51
  - 52
  - 53
  - 54
  - 55
  - 56
  - 57
  - 58
  - 59
  - 60
7. Jiang B, Hua J, Wang Y, et al. Evaluation of the impact of breast milk expression in early postpartum period on breastfeeding duration: a prospective cohort study. *BMC Pregnancy Childbirth* 2015;15:268. doi: 10.1186/s12884-015-0698-6
8. Azad MB, Vehling L, Chan D, et al. Infant feeding and weight gain: separating breast milk from breastfeeding and formula from food. *Pediatrics* 2018;142(4):e20181092. doi: 10.542/peds.2018-1092
9. Li R, Magadia J, Fein SB, et al. Risk of bottle-feeding for rapid weight gain during the first year of life. *Arch Pediatr Adolesc Med* 2012;166(5):431-36.
10. Boone KM, Geraghty SR, Keim SA. Feeding at the breast and expressed milk feeding: associations with otitis media and diarrhea in infants. *J Pediatr* 2016;174:118-25. doi: 10.1016/j.jpeds.2016.04.006
11. Noel-Weiss J, Boersma S, Kujawa-Myles S. Questioning current definitions for breastfeeding research. *Int Breastfeed J* 2012;7(9). doi: 10.1186/1746-4358-7-9
12. Rasmussen KM, Felice JP, O'Sullivan EJ, et al. The meaning of "breastfeeding" is changing and so must our language about it. *Breastfeed Med* 2017;12(9):510-14. doi: 10.1089/bfm.2017.0073
13. Johns HM, Forster DA, Amir LH, et al. Prevalence and outcomes of breast milk expressing in women with healthy term infants: a systematic review. *BMC Pregnancy Childbirth* 2013;13:212. doi: 10.1186/1471-2393-13-212
14. Felice JP, Cassano PA, Rasmussen KM. Pumping human milk in the early postpartum period: its impact on long-term practices for feeding at the breast and exclusively feeding human milk in a longitudinal survey cohort. *Am J Clin Nutr* 2016;103(5):1267-77. doi: 10.3945/ajcn.115.115733
15. Yourkavitch J, Rasmussen KM, Pence BW, et al. Early, regular breast-milk pumping may lead to early breast-milk feeding cessation. *Public Health Nutr* 2018;21(9):1726-36. doi: 10.1017/S1368980017004281
16. Bai DL, Fong DY, Lok KY, et al. Practices, predictors and consequences of expressed breast-milk feeding in healthy full-term infants. *Public Health Nutr* 2017;20(3):492-503. doi: 10.1017/S136898001600241X
17. Public Health Agency of Canada. Canada Prenatal Nutrition Program (CPNP). Ottawa: PHAC, 2020. Available: <https://www.canada.ca/en/public-health/services/health-promotion/childhood-adolescence/programs-initiatives/canada-prenatal-nutrition-program-cpnp.html> [Accessed 19 Oct 2020].
18. Francis J, Mildon A, Stewart S, et al. Breastfeeding rates are high in a prenatal community support program targeting vulnerable women and offering enhanced postnatal lactation support: a prospective cohort study. *Int J Equity Health* 2021;20(1):71. doi: 10.1186/s12939-021-01386-6
19. Mildon A, Francis J, Stewart S, et al. Effect on breastfeeding practices of providing in-home lactation support to vulnerable women through the Canada Prenatal Nutrition Program: protocol for a pre/post intervention study. *Int Breastfeed J* 2021;16:49. doi: 10.1186/s13006-021-00396-y
20. Francis J, Unger S, Bando N, et al. Postdischarge feeding of very-low-birth-weight infants: adherence to nutrition guidelines. *J Pediatr Gastroenterol Nutr* 2018;67(3):401-08. doi: 10.1097/MPG.0000000000002041

- 1  
2  
3 21. O'Connor DL, Khan S, Weishuhn K, et al. Growth and nutrient intakes of human milk-fed preterm  
4 infants provided with extra energy and nutrients after hospital discharge. *Pediatrics*  
5 2008;121(4):766-76. doi: 10.1542/peds.2007-0054  
6
- 7 22. Health Canada, Canadian Pediatric Society, Dietitians of Canada and Breastfeeding Committee for  
8 Canada. Nutrition for healthy term infants: recommendations from birth to six months. Ottawa:  
9 Health Canada, 2014. Available: [https://www.canada.ca/en/health-canada/services/food-](https://www.canada.ca/en/health-canada/services/food-nutrition/healthy-eating/infant-feeding/nutrition-healthy-term-infants-recommendations-birth-six-months.html)  
10 [nutrition/healthy-eating/infant-feeding/nutrition-healthy-term-infants-recommendations-birth-](https://www.canada.ca/en/health-canada/services/food-nutrition/healthy-eating/infant-feeding/nutrition-healthy-term-infants-recommendations-birth-six-months.html)  
11 [six-months.html](https://www.canada.ca/en/health-canada/services/food-nutrition/healthy-eating/infant-feeding/nutrition-healthy-term-infants-recommendations-birth-six-months.html) [Accessed 20 Nov 2017].  
12
- 13 23. Semenic S, Loiselle C, Gottlieb L. Predictors of the duration of exclusive breastfeeding among first-  
14 time mothers. *Res Nurs Health* 2008;31(5):428-41.  
15
- 16 24. Omand JA, Carsley S, Darling PB, et al. Evaluating the accuracy of a geographic closed-ended  
17 approach to ethnicity measurement, a practical alternative. *Ann Epidemiol* 2014;24(4):246-53.  
18 doi: 10.1016/j.annepidem.2013.12.015  
19
- 20 25. Statistics Canada. Table 11-10-0241-01. Low income cut-offs (LICOs) before and after tax by  
21 community size and family size, in current dollars. Ottawa: Statistics Canada, 2020. Available:  
22 <https://www150.statcan.gc.ca/t1/tbl1/en/tv.action?pid=1110024101> [Accessed 16 July 2020].  
23
- 24 26. Statistics Canada. Employment Insurance Coverage Survey – 2018. Ottawa, Canada: Statistics  
25 Canada; 2018. Available:  
26 [https://www23.statcan.gc.ca/imdb/p3Instr.pl?Function=assembleInstr&lang=en&Item\\_Id=4943](https://www23.statcan.gc.ca/imdb/p3Instr.pl?Function=assembleInstr&lang=en&Item_Id=494316#qb367084)  
27 [16#qb367084](https://www23.statcan.gc.ca/imdb/p3Instr.pl?Function=assembleInstr&lang=en&Item_Id=494316#qb367084) [Accessed 7 Jan 2019].  
28
- 29 27. Health Canada. Canadian Community Health Survey cycle 2.2, nutrition (2004) - Income-related  
30 household food security in Canada. Ottawa: Health Canada, 2007. Available:  
31 [https://www.canada.ca/content/dam/hc-sc/migration/hc-sc/fn-an/alt\\_formats/hpfb-](https://www.canada.ca/content/dam/hc-sc/migration/hc-sc/fn-an/alt_formats/hpfb-dgpsa/pdf/surveill/income_food_sec-sec_alim-eng.pdf)  
32 [dgpsa/pdf/surveill/income\\_food\\_sec-sec\\_alim-eng.pdf](https://www.canada.ca/content/dam/hc-sc/migration/hc-sc/fn-an/alt_formats/hpfb-dgpsa/pdf/surveill/income_food_sec-sec_alim-eng.pdf) [Accessed 31 Oct 2017].  
33
- 34 28. HealthCanada. Determining food security status. Ottawa: Government of Canada, 2020. Available:  
35 [https://www.canada.ca/en/health-canada/services/food-nutrition/food-nutrition-](https://www.canada.ca/en/health-canada/services/food-nutrition/food-nutrition-surveillance/health-nutrition-surveys/canadian-community-health-survey-cchs/household-food-insecurity-canada-overview/determining-food-security-status-food-nutrition-surveillance-health-canada.html)  
36 [surveillance/health-nutrition-surveys/canadian-community-health-survey-cchs/household-food-](https://www.canada.ca/en/health-canada/services/food-nutrition/food-nutrition-surveillance/health-nutrition-surveys/canadian-community-health-survey-cchs/household-food-insecurity-canada-overview/determining-food-security-status-food-nutrition-surveillance-health-canada.html)  
37 [insecurity-canada-overview/determining-food-security-status-food-nutrition-surveillance-](https://www.canada.ca/en/health-canada/services/food-nutrition/food-nutrition-surveillance/health-nutrition-surveys/canadian-community-health-survey-cchs/household-food-insecurity-canada-overview/determining-food-security-status-food-nutrition-surveillance-health-canada.html)  
38 [health-canada.html](https://www.canada.ca/en/health-canada/services/food-nutrition/food-nutrition-surveillance/health-nutrition-surveys/canadian-community-health-survey-cchs/household-food-insecurity-canada-overview/determining-food-security-status-food-nutrition-surveillance-health-canada.html) [Accessed 3 Nov 2020].  
39
- 40 29. Dennis CL. The Breastfeeding Self-Efficacy Scale: Psychometric Assessment of the Short Form. *J*  
41 *Obstet Gynecol Neonatal Nurs* 2003;32(6):734-44. doi: 10.1177/0884217503258459  
42
- 43 30. Mildon A, Francis, J, Stewart S, et al. High levels of breastmilk feeding despite a low rate of exclusive  
44 breastfeeding for six months in a cohort of vulnerable women in Toronto, Canada. *Matern Child*  
45 *Nutr* 2021;in press.  
46
- 47 31. Schwartz K, D'Arcy HJS, Gillespie B, et al. Factors associated with weaning in the first 3 months  
48 postpartum. *J Fam Pract* 2002;51(5):439-44.  
49
- 50 32. Loewenberg Weisband Y, Keim SA, Keder LM, et al. Early Breast Milk Pumping Intentions Among  
51 Postpartum Women. *Breastfeed Med* 2017;12:28-32. doi: 10.1089/bfm.2016.0142  
52
- 53 33. Pang WW, Bernard JY, Thavamani G, et al. Direct vs. Expressed Breast Milk Feeding: Relation to  
54 Duration of Breastfeeding. *Nutrients* 2017;9(6) doi: 10.3390/nu9060547  
55  
56  
57  
58  
59

- 1  
2  
3 34. Odom EC, RLi R, Scanlon KS, et al. Reasons for earlier than desired cessation of breastfeeding.  
4 *Pediatrics* 2013;131:e726-e32.  
5  
6 35. Gatti L. Maternal perceptions of insufficient milk supply in breastfeeding. *Journal of Nursing*  
7 *Scholarship* 2008;40(4):355-63.  
8  
9 36. Kent JC, Prime DK, Garbin CP. Principles for maintaining or increasing breast milk production. *J*  
10 *Obstet Gynecol Neonatal Nurs* 2012;41(1):114-21. doi: 10.1111/j.1552-6909.2011.01313.x  
11  
12 37. World Health Organization. Evidence for the ten steps to successful breastfeeding. Geneva: WHO,  
13 1998. Available:  
14 [http://apps.who.int/iris/bitstream/handle/10665/43633/9241591544\\_eng.pdf;jsessionid=220F8](http://apps.who.int/iris/bitstream/handle/10665/43633/9241591544_eng.pdf;jsessionid=220F8D9CA6C3BE610A529B8EDB4F2595?sequence=1)  
15 [D9CA6C3BE610A529B8EDB4F2595?sequence=1](http://apps.who.int/iris/bitstream/handle/10665/43633/9241591544_eng.pdf;jsessionid=220F8D9CA6C3BE610A529B8EDB4F2595?sequence=1) [Accessed 20 July 2016].  
16  
17 38. Perez-Escamilla R, Martinez JL, Segura-Perez S. Impact of the Baby-friendly Hospital Initiative on  
18 breastfeeding and child health outcomes: a systematic review. *Matern Child Nutr* 2016 doi:  
19 10.1111/mcn.12294  
20  
21 39. World Health Organization. Guideline: counselling of women to improve breastfeeding practices.  
22 Geneva: WHO, 2018. Available:  
23 <https://apps.who.int/iris/bitstream/handle/10665/280133/9789241550468-eng.pdf?ua=1>  
24 [Accessed 22 Oct 2019].  
25  
26 40. Dias CC, Figueiredo B. Breastfeeding and depression: a systematic review of the literature. *J Affect*  
27 *Disord* 2015;171:142-54. doi: 10.1016/j.jad.2014.09.022  
28  
29 41. Francis J, Mildon A, Stewart S, et al. Vulnerable mothers' experiences breastfeeding with an  
30 enhanced community lactation support program. *Matern Child Nutr* 2020;16(3):e12957. doi:  
31 10.1111/mcn.12957  
32  
33 42. Falah-Hassani K, Shiri R, Vigod S, et al. Prevalence of postpartum depression among immigrant  
34 women: A systematic review and meta-analysis. *J Psychiatr Res* 2015;70:67-82. doi:  
35 10.1016/j.jpsychires.2015.08.010  
36  
37 43. Li R, Scanlon KS, Serdula MK. The Validity and Reliability of Maternal Recall of Breastfeeding Practice.  
38 *Nutr Rev* 2005;63(4):103-10. doi: 10.1111/j.1753-4887.2005.tb00128.x  
39  
40 44. Barnett J, Aguilar S, Brittner M, et al. Recruiting and retaining low-income, multi-ethnic women into  
41 randomized controlled trials: successful strategies and staffing. *Contemp Clinl Trials*  
42 2012;33(5):925-32. doi: 10.1016/j.cct.2012.06.005  
43  
44 45. Felice JP, Rasmussen KM. Breasts, pumps and bottles, and unanswered questions. *Breastfeed Med*  
45 2015;10(9) doi: 10.1089/bfm.2015.0107  
46  
47  
48

#### 49 **List of figures**

50  
51  
52 Figure 1. Participant flow diagram  
53

#### 54 **Supplemental file**

1  
2  
3 Supplemental Table 1. Multivariable logistic regression analysis: between-category comparison for  
4 association between ethnicity and cessation of any human milk feeding by 6 months postpartum  
5  
6  
7  
8  
9  
10  
11  
12  
13  
14  
15  
16  
17  
18  
19  
20  
21  
22  
23  
24  
25  
26  
27  
28  
29  
30  
31  
32  
33  
34  
35  
36  
37  
38  
39  
40  
41  
42  
43  
44  
45  
46  
47  
48  
49  
50  
51  
52  
53  
54  
55  
56  
57  
58  
59  
60

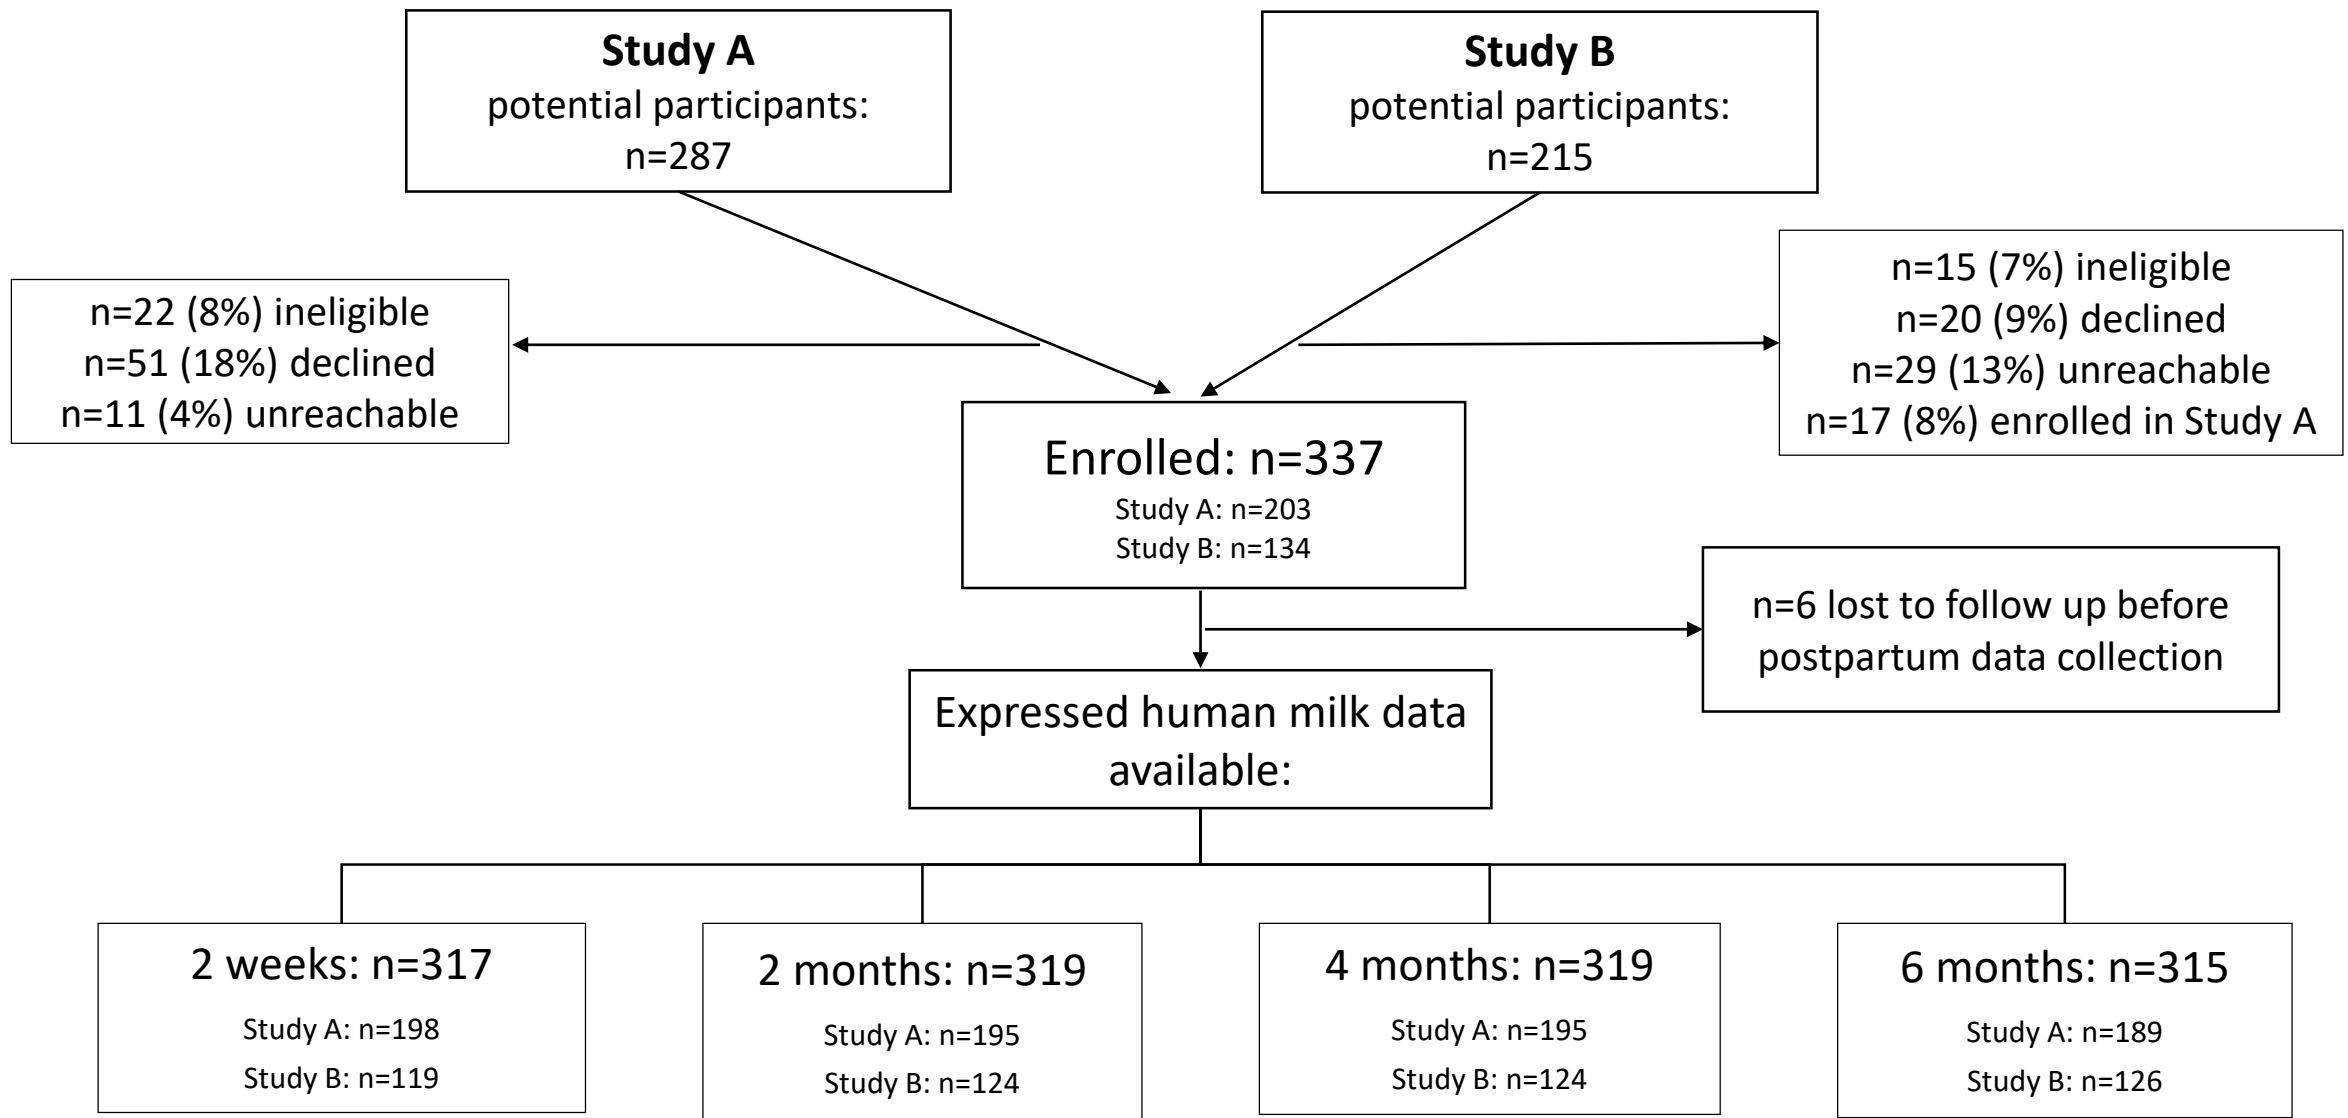

1  
2  
3  
4  
5  
6  
7  
8  
9  
10  
11  
12  
13  
14  
15  
16  
17  
18  
19  
20  
21  
22  
23  
24  
25  
26  
27  
28  
29  
30  
31  
32  
33  
34  
35  
36  
37  
38  
39  
40  
41

**Supplemental Table 1.** Multivariable logistic regression analysis: between-category comparison for association between ethnicity and cessation of any human milk feeding by 6 months postpartum.

| <b>Ethnicity category*</b> | <b>Adjusted Odds Ratio (95% Confidence Intervals)</b> | <b>p-value</b> |
|----------------------------|-------------------------------------------------------|----------------|
| East Asian                 | 5.03 (1.06-23.92)                                     | 0.042          |
| Other Asian                | 6.43 (1.17-35.43)                                     | 0.033          |
| European/Caribbean/Other   | 14.42 (2.63-78.97)                                    | 0.002          |
| Latin American             | 9.48 (1.82-49.53)                                     | 0.008          |

\*Reference category: African ethnicity.

Model adjusted for expressed human milk use at two weeks postpartum, parity, hospital formula, and access to IBCLC services through the CPNP.

IBCLC=International Board Certified Lactation Consultant; CPNP=Canada Prenatal Nutrition Program.

**STROBE 2007 (v4) checklist of items to be included in reports of observational studies in epidemiology\***  
**Checklist for cohort, case-control, and cross-sectional studies (combined)**

| Section/Topic             | Item # | Recommendation                                                                                                                                                                                                                                                                                                                                                                                                                                                         | Reported on page # |
|---------------------------|--------|------------------------------------------------------------------------------------------------------------------------------------------------------------------------------------------------------------------------------------------------------------------------------------------------------------------------------------------------------------------------------------------------------------------------------------------------------------------------|--------------------|
| Title and abstract        | 1      | (a) Indicate the study's design with a commonly used term in the title or the abstract                                                                                                                                                                                                                                                                                                                                                                                 | 1                  |
|                           |        | (b) Provide in the abstract an informative and balanced summary of what was done and what was found                                                                                                                                                                                                                                                                                                                                                                    | 1                  |
| <b>Introduction</b>       |        |                                                                                                                                                                                                                                                                                                                                                                                                                                                                        |                    |
| Background/rationale      | 2      | Explain the scientific background and rationale for the investigation being reported                                                                                                                                                                                                                                                                                                                                                                                   | 2-3                |
| Objectives                | 3      | State specific objectives, including any pre-specified hypotheses                                                                                                                                                                                                                                                                                                                                                                                                      | 3                  |
| <b>Methods</b>            |        |                                                                                                                                                                                                                                                                                                                                                                                                                                                                        |                    |
| Study design              | 4      | Present key elements of study design early in the paper                                                                                                                                                                                                                                                                                                                                                                                                                | 4                  |
| Setting                   | 5      | Describe the setting, locations, and relevant dates, including periods of recruitment, exposure, follow-up, and data collection                                                                                                                                                                                                                                                                                                                                        | 4-5                |
| Participants              | 6      | (a) <i>Cohort study</i> —Give the eligibility criteria, and the sources and methods of selection of participants. Describe methods of follow-up<br><i>Case-control study</i> —Give the eligibility criteria, and the sources and methods of case ascertainment and control selection. Give the rationale for the choice of cases and controls<br><i>Cross-sectional study</i> —Give the eligibility criteria, and the sources and methods of selection of participants | 4-5                |
|                           |        | (b) <i>Cohort study</i> —For matched studies, give matching criteria and number of exposed and unexposed<br><i>Case-control study</i> —For matched studies, give matching criteria and the number of controls per case                                                                                                                                                                                                                                                 | n/a                |
| Variables                 | 7      | Clearly define all outcomes, exposures, predictors, potential confounders, and effect modifiers. Give diagnostic criteria, if applicable                                                                                                                                                                                                                                                                                                                               | 6-9                |
| Data sources/ measurement | 8*     | For each variable of interest, give sources of data and details of methods of assessment (measurement). Describe comparability of assessment methods if there is more than one group                                                                                                                                                                                                                                                                                   | 5-7                |
| Bias                      | 9      | Describe any efforts to address potential sources of bias                                                                                                                                                                                                                                                                                                                                                                                                              | 5, 16-17           |
| Study size                | 10     | Explain how the study size was arrived at                                                                                                                                                                                                                                                                                                                                                                                                                              | 9                  |
| Quantitative variables    | 11     | Explain how quantitative variables were handled in the analyses. If applicable, describe which groupings were chosen and why                                                                                                                                                                                                                                                                                                                                           | 8-9                |
| Statistical methods       | 12     | (a) Describe all statistical methods, including those used to control for confounding                                                                                                                                                                                                                                                                                                                                                                                  | 8-9                |
|                           |        | (b) Describe any methods used to examine subgroups and interactions                                                                                                                                                                                                                                                                                                                                                                                                    | 9                  |
|                           |        | (c) Explain how missing data were addressed                                                                                                                                                                                                                                                                                                                                                                                                                            | 8                  |
|                           |        | (d) <i>Cohort study</i> —If applicable, explain how loss to follow-up was addressed<br><i>Case-control study</i> —If applicable, explain how matching of cases and controls was addressed                                                                                                                                                                                                                                                                              | n/a                |

|                          |     |                                                                                                                                                                                                              |                |
|--------------------------|-----|--------------------------------------------------------------------------------------------------------------------------------------------------------------------------------------------------------------|----------------|
|                          |     | <i>Cross-sectional study</i> —If applicable, describe analytical methods taking account of sampling strategy                                                                                                 |                |
|                          |     | (e) Describe any sensitivity analyses                                                                                                                                                                        | n/a            |
| <b>Results</b>           |     |                                                                                                                                                                                                              |                |
| Participants             | 13* | (a) Report numbers of individuals at each stage of study—eg numbers potentially eligible, examined for eligibility, confirmed eligible, included in the study, completing follow-up, and analysed            | 9/Fig 1        |
|                          |     | (b) Give reasons for non-participation at each stage                                                                                                                                                         | 9/Fig 1        |
|                          |     | (c) Consider use of a flow diagram                                                                                                                                                                           | Fig 1          |
| Descriptive data         | 14* | (a) Give characteristics of study participants (eg demographic, clinical, social) and information on exposures and potential confounders                                                                     | 9-11           |
|                          |     | (b) Indicate number of participants with missing data for each variable of interest                                                                                                                          | Tables p.10-14 |
|                          |     | (c) <i>Cohort study</i> —Summarise follow-up time (eg, average and total amount)                                                                                                                             | 9/Fig 1        |
| Outcome data             | 15* | <i>Cohort study</i> —Report numbers of outcome events or summary measures over time                                                                                                                          | 11             |
|                          |     | <i>Case-control study</i> —Report numbers in each exposure category, or summary measures of exposure                                                                                                         |                |
|                          |     | <i>Cross-sectional study</i> —Report numbers of outcome events or summary measures                                                                                                                           |                |
| Main results             | 16  | (a) Give unadjusted estimates and, if applicable, confounder-adjusted estimates and their precision (eg, 95% confidence interval). Make clear which confounders were adjusted for and why they were included | 13-14          |
|                          |     | (b) Report category boundaries when continuous variables were categorized                                                                                                                                    | n/a            |
|                          |     | (c) If relevant, consider translating estimates of relative risk into absolute risk for a meaningful time period                                                                                             | n/a            |
| Other analyses           | 17  | Report other analyses done—eg analyses of subgroups and interactions, and sensitivity analyses                                                                                                               | 12-14          |
| <b>Discussion</b>        |     |                                                                                                                                                                                                              |                |
| Key results              | 18  | Summarise key results with reference to study objectives                                                                                                                                                     | 14             |
| Limitations              | 19  | Discuss limitations of the study, taking into account sources of potential bias or imprecision. Discuss both direction and magnitude of any potential bias                                                   | 16-17          |
| Interpretation           | 20  | Give a cautious overall interpretation of results considering objectives, limitations, multiplicity of analyses, results from similar studies, and other relevant evidence                                   | 17             |
| Generalisability         | 21  | Discuss the generalisability (external validity) of the study results                                                                                                                                        | 17             |
| <b>Other information</b> |     |                                                                                                                                                                                                              |                |
| Funding                  | 22  | Give the source of funding and the role of the funders for the present study and, if applicable, for the original study on which the present article is based                                                | 18             |

\*Give information separately for cases and controls in case-control studies and, if applicable, for exposed and unexposed groups in cohort and cross-sectional studies.

**Note:** An Explanation and Elaboration article discusses each checklist item and gives methodological background and published examples of transparent reporting. The STROBE checklist is best used in conjunction with this article (freely available on the Web sites of PLoS Medicine at <http://www.plosmedicine.org/>, Annals of Internal Medicine at <http://www.annals.org/>, and Epidemiology at <http://www.epidem.com/>). Information on the STROBE Initiative is available at [www.strobe-statement.org](http://www.strobe-statement.org).



# BMJ Open

## Associations between use of expressed human milk at two weeks postpartum and human milk feeding practices to six months: a prospective cohort study with vulnerable women in Toronto, Canada

|                                 |                                                                                                                                                                                                                                                                                                                                                                                                                                                                                                                                                                                                                                                                                                                                                                                                                                                                                                                                                                                                                                         |
|---------------------------------|-----------------------------------------------------------------------------------------------------------------------------------------------------------------------------------------------------------------------------------------------------------------------------------------------------------------------------------------------------------------------------------------------------------------------------------------------------------------------------------------------------------------------------------------------------------------------------------------------------------------------------------------------------------------------------------------------------------------------------------------------------------------------------------------------------------------------------------------------------------------------------------------------------------------------------------------------------------------------------------------------------------------------------------------|
| Journal:                        | <i>BMJ Open</i>                                                                                                                                                                                                                                                                                                                                                                                                                                                                                                                                                                                                                                                                                                                                                                                                                                                                                                                                                                                                                         |
| Manuscript ID                   | bmjopen-2021-055830.R1                                                                                                                                                                                                                                                                                                                                                                                                                                                                                                                                                                                                                                                                                                                                                                                                                                                                                                                                                                                                                  |
| Article Type:                   | Original research                                                                                                                                                                                                                                                                                                                                                                                                                                                                                                                                                                                                                                                                                                                                                                                                                                                                                                                                                                                                                       |
| Date Submitted by the Author:   | 21-Jan-2022                                                                                                                                                                                                                                                                                                                                                                                                                                                                                                                                                                                                                                                                                                                                                                                                                                                                                                                                                                                                                             |
| Complete List of Authors:       | Mildon, Alison; University of Toronto Temerty Faculty of Medicine, Nutritional Sciences<br>Francis, Jane; University of Toronto Temerty Faculty of Medicine, Nutritional Sciences<br>Stewart, Stacia; Parkdale Queen West Community Health Centre, Health Promotion and Community Engagement<br>Underhill, Bronwyn; Parkdale Queen West Community Health Centre, Health Promotion and Community Engagement<br>Ng, Yi Man; Parkdale Queen West Community Health Centre, Health Promotion and Community Engagement<br>Rousseau, Christina; The Stop Community Food Centre<br>Di Ruggiero, Erica; University of Toronto, Dalla Lana School of Public Health<br>Dennis, CindyLee; University of Toronto, Lawrence S. Bloomberg Faculty of Nursing<br>Kiss, Alex; Sunnybrooke Research Institute, Department of Research Design and Biostatistics<br>O'Connor, Deborah L; University of Toronto Temerty Faculty of Medicine, Nutritional Sciences<br>Sellen, Daniel; University of Toronto Temerty Faculty of Medicine, Nutritional Sciences |
| <b>Primary Subject Heading</b>: | Public health                                                                                                                                                                                                                                                                                                                                                                                                                                                                                                                                                                                                                                                                                                                                                                                                                                                                                                                                                                                                                           |
| Secondary Subject Heading:      | Paediatrics                                                                                                                                                                                                                                                                                                                                                                                                                                                                                                                                                                                                                                                                                                                                                                                                                                                                                                                                                                                                                             |
| Keywords:                       | PUBLIC HEALTH, Community child health < PAEDIATRICS, NUTRITION & DIETETICS                                                                                                                                                                                                                                                                                                                                                                                                                                                                                                                                                                                                                                                                                                                                                                                                                                                                                                                                                              |
|                                 |                                                                                                                                                                                                                                                                                                                                                                                                                                                                                                                                                                                                                                                                                                                                                                                                                                                                                                                                                                                                                                         |

SCHOLARONE™  
Manuscripts

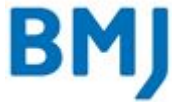

I, the Submitting Author has the right to grant and does grant on behalf of all authors of the Work (as defined in the below author licence), an exclusive licence and/or a non-exclusive licence for contributions from authors who are: i) UK Crown employees; ii) where BMJ has agreed a CC-BY licence shall apply, and/or iii) in accordance with the terms applicable for US Federal Government officers or employees acting as part of their official duties; on a worldwide, perpetual, irrevocable, royalty-free basis to BMJ Publishing Group Ltd ("BMJ") its licensees and where the relevant Journal is co-owned by BMJ to the co-owners of the Journal, to publish the Work in this journal and any other BMJ products and to exploit all rights, as set out in our [licence](#).

The Submitting Author accepts and understands that any supply made under these terms is made by BMJ to the Submitting Author unless you are acting as an employee on behalf of your employer or a postgraduate student of an affiliated institution which is paying any applicable article publishing charge ("APC") for Open Access articles. Where the Submitting Author wishes to make the Work available on an Open Access basis (and intends to pay the relevant APC), the terms of reuse of such Open Access shall be governed by a Creative Commons licence – details of these licences and which [Creative Commons](#) licence will apply to this Work are set out in our licence referred to above.

Other than as permitted in any relevant BMJ Author's Self Archiving Policies, I confirm this Work has not been accepted for publication elsewhere, is not being considered for publication elsewhere and does not duplicate material already published. I confirm all authors consent to publication of this Work and authorise the granting of this licence.

1  
2  
3  
4  
5 Associations between use of expressed human milk at two weeks  
6  
7 postpartum and human milk feeding practices to six months: a  
8  
9 prospective cohort study with vulnerable women in Toronto,  
10  
11  
12 Canada  
13  
14  
15

16 Alison Mildon<sup>1</sup>, Jane Francis<sup>1,2</sup>, Stacia Stewart<sup>3</sup>, Bronwyn Underhill<sup>3</sup>, Yi Man Ng<sup>3</sup>, Christina Rousseau<sup>4</sup>,  
17 Erica Di Ruggiero<sup>5</sup>, Cindy-Lee Dennis<sup>6</sup>, Alex Kiss<sup>7</sup>, Deborah L. O'Connor<sup>1,2,8,9</sup>, Daniel W. Sellen<sup>1,5,8,10</sup>  
18

19 Deborah L. O'Connor, PhD and Daniel W. Sellen, PhD are co-senior authors  
20

21 Alison Mildon ORCID: 0000-0002-5550-0040  
22

23 Jane Francis ORCID: 0000-0001-6676-6533  
24

25 Deborah L. O'Connor ORCID: 0000-0001-6331-091X  
26

27 Daniel W. Sellen ORCID: 0000-0003-2124-6977  
28

29 <sup>1</sup>Nutritional Sciences, Temerty Faculty of Medicine, University of Toronto, Toronto, Ontario, Canada  
30

31 <sup>2</sup>Translational Medicine Program, The Hospital for Sick Children, Toronto, Ontario, Canada  
32

33 <sup>3</sup>Health Promotion and Community Engagement, Parkdale-Queen West Community Health Centre,  
34 Toronto, Ontario, Canada  
35

36 <sup>4</sup>The Stop Community Food Centre, Toronto, Ontario, Canada  
37

38 <sup>5</sup>Dalla Lana School of Public Health, University of Toronto, Toronto, Ontario, Canada  
39

40 <sup>6</sup>Lawrence-Bloomberg Faculty of Nursing, University of Toronto, Toronto, Ontario, Canada  
41

42 <sup>7</sup>Research Design and Biostatistics, Sunnybrook Research Institute, Toronto, Ontario, Canada  
43

44 <sup>8</sup>Joannah and Brian Lawson Centre for Child Nutrition, University of Toronto, Toronto, Ontario, Canada  
45

46 <sup>9</sup>Pediatrics, Sinai Health, Toronto, Ontario, Canada  
47

48 <sup>10</sup>Anthropology, Faculty of Arts and Sciences, University of Toronto, Toronto, Ontario, Canada  
49

50 Address for Correspondence:  
51

52 Prof. Daniel Sellen  
53

54 Department of Nutritional Sciences  
55

56 Temerty Faculty of Medicine, University of Toronto  
57

58 1 King's College Circle, Room 5253A  
59

60 Toronto, Ontario, Canada M5S 1A8

Email: dan.sellen@utoronto.ca

Word counts:

Manuscript: 4551 words

Abstract: 300 words

1  
2  
3  
4  
5  
6  
7  
8  
9  
10  
11  
12  
13  
14  
15  
16  
17  
18  
19  
20  
21  
22  
23  
24  
25  
26  
27  
28  
29  
30  
31  
32  
33  
34  
35  
36  
37  
38  
39  
40  
41  
42  
43  
44  
45  
46  
47  
48  
49  
50  
51  
52  
53  
54  
55  
56  
57  
58  
59  
60

For peer review only

1  
2  
3  
4  
5 Associations between use of expressed human milk at two weeks  
6  
7 postpartum and human milk feeding practices to six months: a  
8  
9 prospective cohort study with vulnerable women in Toronto,  
10  
11  
12 Canada  
13  
14

15  
16 **ABSTRACT**  
17

18 **Objectives:** To examine whether use of expressed human milk in the first two weeks postpartum is  
19  
20 associated with cessation of human milk feeding and non-exclusive human milk feeding up to six  
21  
22 months.  
23

24  
25 **Design:** pooled data from two prospective cohort studies  
26

27  
28 **Setting:** three Canada Prenatal Nutrition Program (CPNP) sites serving vulnerable families in Toronto,  
29  
30 Canada  
31

32  
33 **Participants:** 337 registered CPNP clients enrolled prenatally from 2017-2020; 315 (93%) were retained  
34  
35 to six months postpartum. Exclusions: pregnancy loss or participation in prior related study; Study B:  
36  
37 preterm birth (<34 weeks); plan to move outside Toronto; not intending to feed human milk;  
38  
39 hospitalization of mother or baby at two weeks postpartum.  
40

41  
42 **Primary and Secondary Outcome Measures:** *Main exposure variable:* any use of expressed human milk  
43  
44 at two weeks postpartum. *Outcomes:* cessation of human milk feeding by six months; non-exclusive  
45  
46 human milk feeding to four months and six months postpartum.  
47

48  
49 **Results:** All participants initiated human milk feeding and 80% continued for six months. Exclusive  
50  
51 human milk feeding was practiced post-discharge to four months by 28% and to six months by 16%. At  
52  
53 two weeks postpartum, 34% reported use of expressed human milk. Any use of expressed human milk  
54  
55 at two weeks was associated with cessation of human milk feeding before six months postpartum (aOR  
56  
57  
58  
59  
60

1  
2  
3 2.66; 95% CI: 1.41-5.05) and with non-exclusive human milk feeding to four months (aOR 2.19; 95% CI  
4 1.16-4.14) and six months (aOR 3.65; 95% CI 1.50-8.84).

7 **Conclusions:** Early postpartum use of expressed human milk predicted early cessation and non-exclusive  
8 human milk feeding for four and six months postpartum among vulnerable women living in an urban  
9 Canadian context and accessing community perinatal programs. Further research is needed to  
10 determine whether early use of expressed human milk is a marker of lactation difficulties or undermines  
11 longer-term human milk feeding practices.

12 **Registration:** Clinicaltrials.gov NCT03400605, NCT03589963.

13 **Key words:** human milk, milk expression, lactation, infant feeding

## ARTICLE SUMMARY

### Strengths and limitations of this study:

- This is one of the first studies to examine expressed human milk use by vulnerable women.
- Infant feeding data were collected prospectively at 4 time points from two weeks to six months postpartum, limiting the recall period to improve data accuracy.
- Analysis of associations between expressed human milk use and later human milk feeding practices focused on the first two weeks postpartum when lactation is being established.
- Data collection did not include intentions to pump or feed expressed human milk, reasons for use of expressed human milk or maternal employment status.

## BACKGROUND

50 The World Health Organization (WHO) recommendation that all infants receive exclusive human  
51 milk (HM) feeding for the first six months of life in order to optimize health and development outcomes  
52 is an important global public health goal.[1] The WHO definition does not differentiate between  
53  
54  
55  
56  
57  
58  
59

1  
2  
3 feeding HM directly at the breast and HM expressed either by hand or use of a breast pump and fed to  
4 the infant via a cup, bottle or other device.[2] Over the past two decades breast pump use has become  
5 widespread in high-income countries and the provision of expressed HM is now a major component of  
6  
7  
8  
9  
10  
11  
12  
13  
14  
15  
16  
17  
18  
19  
20  
21  
22  
23  
24  
25  
26  
27  
28  
29  
30  
31  
32  
33  
34  
35  
36  
37  
38  
39  
40  
41  
42  
43  
44  
45  
46  
47  
48  
49  
50  
51  
52  
53  
54  
55  
56  
57  
58  
59  
60

feeding HM directly at the breast and HM expressed either by hand or use of a breast pump and fed to the infant via a cup, bottle or other device.[2] Over the past two decades breast pump use has become widespread in high-income countries and the provision of expressed HM is now a major component of HM feeding for many families with term-born infants.[3-5] Several studies have found high rates of obtaining pumps by the early postpartum period including use of expressed HM during the hospital stay.[4, 6, 7] However, there is growing evidence that expressed HM is not equivalent to HM obtained through direct feeding at the breast. Observational studies with large sample sizes have found that provision of expressed HM but no formula is associated with higher risks of otitis media, wheezing and rapid weight gain within the first year of life in comparison to exclusive feeding at the breast.[8-10] These findings have prompted the call for more nuanced assessment of HM feeding practices to include data on pumping and use of expressed HM.[11, 12]

In addition to concerns about health effects, use of expressed HM feeding has been associated with shorter duration of any and exclusive HM feeding, although findings are mixed.[13] It is likely that this inconsistency relates to variations between studies in factors such as infant age at the start of pumping or expressed HM feeding, and reasons for providing and degree of reliance on expressed HM. Recent analyses of longitudinal prospective cohort studies have found that pumping and/or expressed HM feeding earlier in the postpartum period, for non-elective reasons (ie. to manage difficulties feeding at the breast or return to work) and with higher frequency is associated with early cessation of any and exclusive HM feeding.[7, 14-16] However, the samples in these studies tend to be biased towards women of higher-socioeconomic status so may not reflect expressed HM feeding practices of more vulnerable women.

In this paper we report expressed HM feeding practices and associated HM feeding outcomes over the first six months postpartum among women recruited through the Canada Prenatal Nutrition Program (CPNP; a national program designed to serve socially and/or economically vulnerable women)

1  
2  
3 at three sites in Toronto. Our objectives were to examine: i) the prevalence of expressed HM use at two  
4 weeks and two, four and six months postpartum; and ii) associations between use of expressed HM at  
5 two weeks and HM feeding outcomes (cessation before six months and non-exclusive HM feeding to  
6 four and six months postpartum).  
7  
8  
9  
10

## 11 **METHODS**

### 12 **Study setting and participants**

13  
14  
15  
16 This analysis utilizes infant feeding data collected prospectively from birth mothers in two  
17 studies conducted within a research program designed to examine the potential for delivering postnatal  
18 lactation support through the CPNP. The CPNP is a federally funded initiative implemented through  
19 community agencies with the aims of improving birth outcomes and HM feeding among vulnerable  
20 women, such as those with low income or education, newcomers, adolescents, single parents and those  
21 with a history of trauma or substance use.[17] CPNP activities vary between sites based on local needs  
22 and available partnerships, but are usually implemented as weekly drop-in programs. Core services  
23 include group health and nutrition education, provision of food and/or grocery vouchers, individual  
24 supports such as nutrition counseling, and referrals to other community services.[17]  
25  
26  
27  
28  
29  
30  
31  
32  
33  
34  
35  
36  
37

38  
39 Participants in both studies were registered in the CPNP at one of three specific sites in Toronto,  
40 Canada, and were recruited prenatally. The population of the combined catchment areas of the three  
41 CPNP sites is over 180,000. Detailed methods for both studies have been published previously. Study A  
42 was a prospective cohort study of infant feeding practices among clients of a CPNP site offering skilled  
43 postnatal lactation support with additional charitable funding from The Sprott Foundation.[18] Study B  
44 was a pre/post intervention study designed to examine the effectiveness of implementing similar  
45 lactation support services in two other CPNP sites.[19] The target sample size for Study B was 210,  
46 based on an anticipated 20 percentage point difference in exclusive HM feeding at four months  
47  
48  
49  
50  
51  
52  
53  
54  
55  
56  
57  
58  
59  
60



1  
2  
3 postpartum between the pre- and post-intervention groups, with 80% power, alpha=0.05, and  
4 allowance for 10% attrition.[19]  
5

6  
7 Inclusion criteria were prenatal registration in one of the CPNP sites, and for Study B, intention  
8 to feed human milk and to continue living in Toronto with the infant. Exclusion criteria were pregnancy  
9 loss and for Study A, participation in a prior related study. Exclusion criteria for Study B were preterm  
10 birth (<34 weeks gestation), medical issue affecting feeding and hospitalization of either the mother or  
11 infant at two weeks postpartum. Recruitment was conducted from August 2017-January 2020 for Study  
12 A and from November 2018-March 2020 for Study B. Due to the COVID-19 pandemic, Study B was  
13 suspended in March 2020 following a brief intervention period and incomplete recruitment of the post-  
14 intervention group, but data collection was completed with all enrolled participants. Data from Study B  
15 participants recruited to both the pre- and post-intervention groups were pooled with Study A data for  
16 the current analysis.  
17  
18  
19  
20  
21  
22  
23  
24  
25  
26  
27  
28  
29

30 All participants in Study A and those recruited to the post-intervention group in Study B had  
31 access to two free, in-home visits from an International Board Certified Lactation Consultant (IBCLC) for  
32 postpartum lactation support, with additional visits approved for complex needs. This service was  
33 promoted prenatally and offered pro-actively by telephone call around the time of birth. Double-  
34 electric breast pumps were provided by the IBCLCs as needed, but criteria for pump provision were  
35 more flexible for Study A participants as the lactation support was provided as a community program  
36 rather than a research intervention.  
37  
38  
39  
40  
41  
42  
43  
44  
45

## 46 **Patient and public involvement statement**

47

48  
49 Participants in this study were not clinical patients but clients of community perinatal services.  
50  
51 At the time of the study, no engagement committee existed for these service-users to inform the  
52 research. The community programs had participant feedback mechanisms in place regarding service  
53  
54  
55  
56  
57  
58  
59  
60

1  
2  
3 delivery. Community program staff were directly involved in the design, implementation, interpretation  
4  
5 of findings and reporting of this research, including contributing service-user perspectives.  
6  
7

## 8 **Data collection**

9

10 All data collection for Study A was conducted by JF and for Study B by AM or a Mandarin  
11 speaking research assistant. Data collection occurred either in person at the participating CPNP sites or  
12  
13 by telephone. Professional interpreter services were used for Study A participants who did not speak  
14  
15 English (n=14) and Study B participants who did not speak either English or Mandarin (n=20).  
16  
17  
18

19 In Studies A and B, infant feeding data were collected prospectively at two weeks and two, four  
20  
21 and six months postpartum using the same standardized and validated interviewer-administered  
22  
23 questionnaire used previously by our group.[20, 21] In Study B, data were also collected at postpartum  
24  
25 months one, three and five, but only the time points shared with Study A are reported here. At each  
26  
27 time point, participants reported the average number of milk feeds provided to their infant per 24  
28  
29 hours, divided into feeds at the breast, expressed HM feeds and formula feeds. Expressed HM or  
30  
31 formula use as a top-up after feeding at the breast was recorded as well as provision of other liquids and  
32  
33 introduction of solids. The recall period was two weeks. Infant sex and in-hospital formula  
34  
35 supplementation (yes/no) were recorded at the first postpartum contact. Participants who stopped all  
36  
37 HM feeding were asked to recall the last date they provided any HM to their infant and main reasons for  
38  
39 cessation.  
40  
41  
42  
43

44 Participants were categorized as yes or no for any HM feeding, exclusive HM feeding and any  
45  
46 expressed HM feeding at each postpartum time point. Exclusive HM feeding was defined as provision of  
47  
48 HM only, either at the breast or expressed, with the exception of vitamins, medicines and infrequent  
49  
50 (less than daily) water feeds. In accordance with WHO and Health Canada guidance to introduce solids  
51  
52 'around' six months postpartum, participants who introduced solids up to 14 days prior to six months  
53  
54 but otherwise provided only HM were classified as exclusively HM feeding at six months postpartum.[1,  
55  
56  
57  
58  
59  
60

1  
2  
3 22] Participants who were exclusively HM feeding at two weeks, two months and four months were  
4  
5 classified as practicing exclusive HM feeding post-discharge to four months, and those who were also  
6  
7 exclusively HM feeding at six months were classified as practicing exclusive HM feeding post-discharge  
8  
9 to six months. Hospital formula supplementation (yes/ no) was considered an independent predictor of  
10  
11 HM feeding outcomes.[23]  
12  
13

14 Maternal socio-demographic data were collected via interviewer-administered questionnaire  
15  
16 prenatally in Study B and at two weeks postpartum in Study A. Socio-demographics included maternal  
17  
18 age (years); parity (primiparous, multiparous); education level (high school or less, post-secondary);  
19  
20 length of time in Canada (<1 year, 1 to <3 years,  $\geq 3$  years, born in Canada); and ethnicity. Participants  
21  
22 self-reported their ethnicity using a standardized list of geographically-based options developed and  
23  
24 validated for a large birth cohort study based in Toronto.[24] Based on the distribution of responses to  
25  
26 the list of geographically-based ethnicities, five categories were defined for analysis (East Asian, Other  
27  
28 Asian, African, Latin American, and European/Caribbean/Other).  
29  
30  
31

32 Gestational age at birth was assessed using participant-reported due dates and infant birth  
33  
34 dates. Participants who gave birth before 37 completed weeks of gestation were classified as having a  
35  
36 preterm birth, with late preterm defined as 34 to <37 completed weeks and moderate preterm as 32 to  
37  
38 <34 completed weeks.[25]  
39  
40

41 In Study A, household income was assessed at two weeks postpartum and classified as above or  
42  
43 below the Statistics Canada size-adjusted Low Income Cut-Off.[26] In Study B, household income  
44  
45 adequacy was assessed at six months postpartum and classified as meeting all, most, some, very little or  
46  
47 none of regular household expenses, using standardized questions from Statistics Canada's Employment  
48  
49 Insurance Coverage Survey.[27] Participants in Study B were also asked about receipt of federal  
50  
51 Employment Insurance maternity leave benefits (yes/no). In both studies, food insecurity was assessed  
52  
53 at six months postpartum using the Household Food Security Survey Module of the Canadian  
54  
55  
56  
57  
58  
59  
60

1  
2  
3 Community Health Survey, and classified as none, marginal, moderate, severe based on the number of  
4 affirmative responses.[28, 29]

5  
6  
7 Receipt of the IBCLC services (yes/no) and number of IBCLC visits (0, 1, >1) was recorded from  
8 CPNP site records for Study A participants and from research records of Study B participants recruited to  
9 the post-intervention group. Although some participants received breast pumps through the IBCLCs, we  
10 did not collect data on the use of these pumps or participants' access to pumps through other sources.  
11  
12  
13  
14  
15

16  
17 In Study B only, the Breastfeeding Self-Efficacy Scale-Short Form was administered at two weeks  
18 postpartum.[30] This is a validated and widely used 14-item scale which produces a score from 14-70,  
19 with higher scores indicating greater breastfeeding self-efficacy.  
20  
21  
22  
23

## 24 **Statistical analysis**

25  
26 Descriptive statistics were calculated for all variables of interest. Continuous measures such as  
27 age were summarized using means and standard deviations whereas categorical measures were  
28 summarized using counts and percentages. For Study B only, a t-test was used to compare mean  
29 breastfeeding self-efficacy scores between participants who did and did not use expressed HM at two  
30 weeks postpartum.  
31  
32  
33  
34  
35  
36

37  
38 Associations between any expressed HM use at two weeks postpartum and HM feeding  
39 outcomes were first assessed by chi-square tests then studied further using multivariable logistic  
40 regression analysis. Participants with data for all exposure variables and the outcome measure were  
41 included each model. Outcome measures were: i) cessation of any HM feeding before six months  
42 postpartum; ii) non-exclusive HM feeding post-discharge to four months postpartum; and iii) non-  
43 exclusive HM feeding post-discharge to six months postpartum. The global recommendation is exclusive  
44 HM feeding for six months,[1] but a separate analysis of Study B data showed that this practice was  
45 frequently compromised after four months by introduction of solids and non-formula fluids.[31] We  
46  
47  
48  
49  
50  
51  
52  
53  
54  
55  
56  
57  
58  
59  
60

1  
2  
3 therefore assessed non-exclusive HM feeding to both four and six months in order to examine  
4  
5 associations with and without the influence of complementary feeding.  
6

7  
8 Potential exposure variables considered for inclusion in the multivariable logistic regression  
9  
10 analysis were: maternal age, education level, parity, years in Canada, geographically-based ethnicity,  
11  
12 infant sex, any household food insecurity, household food insecurity category, hospital formula  
13  
14 supplementation, and access to IBCLC services through the CPNP. Preterm birth was not considered as  
15  
16 the frequency count fell below 10%. Each potential variable was first assessed in bivariate screening for  
17  
18 its association with each outcome, using chi-square tests for categorical variables and t-tests for  
19  
20 continuous variables. Variables with p-values less than 0.15 in bivariate screening were included in the  
21  
22 multivariable logistic regression models for each outcome. Prior to modeling, multicollinearity was  
23  
24 assessed using tolerance statistics. A tolerance value of <0.4 was used as the cut-point for the presence  
25  
26 of multicollinearity. In such cases, only one member of a correlated set would be retained for the  
27  
28 multivariable model.  
29  
30

31  
32 The models were developed to meet the statistical requirements for the number of covariates in  
33  
34 a valid logistic regression model. If the model did not have numerical tolerance for all identified  
35  
36 covariates, those deemed most relevant to the objective and with lowest p-values were retained.  
37  
38 Model fit was assessed using the Hosmer-Lemeshow goodness-of-fit test and area under the curve.  
39  
40 Results are presented using odds ratios and their associated 95% confidence intervals.  
41  
42

43  
44 As preterm birth could not be included as a covariate, we conducted a sensitivity analysis  
45  
46 including only participants with term-born infants. We also conducted an exploratory analysis with the  
47  
48 subsample of participants who had access to IBCLC services through the CPNP sites. We followed the  
49  
50 procedures described above to assess the effect of receiving IBCLC visits on the association between  
51  
52 expressed HM use at two weeks postpartum and HM feeding outcomes. In addition to the potential  
53  
54 exposure variables noted above, bivariate screening included the number of IBCLC visits received (0, 1 or  
55  
56  
57  
58  
59  
60

>1) and multivariable logistic regression models tested for the interaction between expressed HM use and the number of IBCLC visits. If the interaction was not significant, the interaction term was removed and the model rerun.

All statistical analyses were performed using IBM SPSS Statistics for Windows, version 26 (IBM Corp., Armonk, N.Y., USA).

## RESULTS

There were 287 potential participants for Study A and 215 for Study B, of whom 337 were enrolled and 331 provided infant feeding data (Fig. 1). Study retention was high (93%), and 315 participants provided data on expressed HM feeding at six months postpartum. Fourteen participants attended more than one CPNP site and enrolled in both studies simultaneously, and three participants enrolled in both studies but for separate pregnancies. Only the Study A record was retained for each of these participants in the pooled dataset, in order to account for their access to IBCLC services. The mean age of participants was 32 years, the majority (66%) had post-secondary education and 50% were primiparous (Table 1). Almost all participants had term-born infants, and of the 11 (3%) who gave birth before 37 weeks' gestation, ten were classified as late preterm and one was moderately preterm. Ethnic diversity was high in our sample, and 91% of participants were immigrants to Canada, with 38% having lived in Canada for less than three years. Nearly half (44%) reported household food insecurity.

**Table 1.** Participant characteristics

| Characteristic       | Indicator                       | n (%)                    |
|----------------------|---------------------------------|--------------------------|
| Age<br>(N=330)       | mean age (SD): 31.9 years (4.9) |                          |
| Education<br>(N=331) | ≤ high school<br>post-secondary | 113 (34.1)<br>218 (65.9) |
| Parity<br>(N=330)    | primiparous<br>multiparous      | 167 (50.6)<br>163 (49.4) |

|                                                                                                 |                                 |            |
|-------------------------------------------------------------------------------------------------|---------------------------------|------------|
| Newcomer status<br>(N=331)                                                                      | <1 year in Canada               | 46 (13.9)  |
|                                                                                                 | 1 to <3 years in Canada         | 80 (24.2)  |
|                                                                                                 | ≥3 years in Canada              | 175 (52.9) |
|                                                                                                 | born in Canada                  | 30 (9.1)   |
| Ethnicity<br>(N=326)                                                                            | East Asian                      | 129 (39.6) |
|                                                                                                 | Other Asian                     | 51 (15.6)  |
|                                                                                                 | African                         | 42 (12.9)  |
|                                                                                                 | Latin American                  | 59 (18.1)  |
|                                                                                                 | European/Caribbean/Other        | 45 (13.8)  |
| Infant sex<br>(N=331)                                                                           | male                            | 176 (53.2) |
|                                                                                                 | female                          | 155 (46.8) |
| Preterm birth<br>(N=326)                                                                        | no                              | 315 (96.6) |
|                                                                                                 | yes                             | 11 (3.4)   |
| Household food security<br>(N=316)                                                              | secure                          | 176 (55.7) |
|                                                                                                 | marginal insecurity             | 31 (9.8)   |
|                                                                                                 | moderate insecurity             | 74 (23.4)  |
|                                                                                                 | severe insecurity               | 35 (11.1)  |
| Household income<br>(Study A only; N=197)                                                       | below Low Income Cut-Off        | 108 (54.8) |
|                                                                                                 | above Low Income Cut-Off        | 71 (36.0)  |
|                                                                                                 | don't know/prefer not to answer | 18 (9.1)   |
| Proportion of regular expenses<br>met by household income <sup>a</sup><br>(Study B only; N=124) | all                             | 60 (48.4)  |
|                                                                                                 | most                            | 30 (24.2)  |
|                                                                                                 | some                            | 21 (16.9)  |
|                                                                                                 | very little                     | 10 (8.1)   |
|                                                                                                 | none                            | 1 (0.8)    |
|                                                                                                 | don't know/prefer not to answer | 2 (1.6)    |
| Receipt of maternity benefits <sup>b</sup><br>(Study B only; N=124)                             | no                              | 85 (68.5)  |
|                                                                                                 | yes                             | 38 (30.6)  |
|                                                                                                 | don't know/prefer not to answer | 1 (0.1)    |

<sup>a</sup>Categorical variable from Statistics Canada Employment Insurance Coverage Survey, used to assess household income adequacy to meet regular expenses during the first six months postpartum. <sup>b</sup>Categorical variable used to assess receipt of maternity benefits through the federal Employment Insurance program, which has eligibility criteria based on prior employment.

All participants initiated HM feeding but in-hospital formula supplementation was common (57%) (Table 2). Eighty per cent of participants continued feeding HM for at least six months but exclusivity was low. Of the total sample, only 28% practiced exclusive HM feeding post-discharge to four months, and 16% to six months. Nearly three-quarters of all study participants had access to IBCLC services through the CPNP sites. Of these, 72% used the service, with 36% receiving one visit, 30% receiving two visits, and 6% receiving more than two visits.

**Table 2.** Infant feeding practices and utilization of IBCLC services (N=333)

| Indicator                                                | n (%)       |
|----------------------------------------------------------|-------------|
| Initiated human milk feeding                             | 333 (100.0) |
| Infant received formula in hospital (N=325)              | 186 (57.2)  |
| Continued human milk feeding for 6 months (N=323)        | 257 (79.6)  |
| Exclusively fed human milk for at least 4 months (N=320) | 91 (28.4)   |
| Exclusively fed human milk for 6 months (N=322)          | 52 (16.1)   |
| Access to IBCLC services through the CPNP                | 245 (73.6)  |
| Received ≥1 IBCLC visit (N=245)                          | 177 (72.2)  |

IBCLC=International Board Certified Lactation Consultant. CPNP=Canada Prenatal Nutrition Program.

At two weeks postpartum, 34% of participants reported using expressed HM (Table 3). The frequency dropped at each subsequent data collection point to 8% at six months. Nine participants (3%) provided expressed HM at all time points, while 49% never provided expressed HM. Most participants who provided expressed HM used it for at least one daily feed at all time points (75% at 2 weeks, 78% at 2 and 4 months, and 69% at 6 months). The provision of expressed HM as a top-up to feeds at the breast was greatest at two weeks postpartum (6%), and by six months only one participant was using expressed HM in this way (Table 3).

**Table 3.** Expressed human milk feeding practices

| Time Point               | any expressed HM<br>n (%) | daily expressed HM feeds<br>n (%) | occasional expressed HM feeds<br>n (%) | daily expressed HM top-ups<br>n (%) |
|--------------------------|---------------------------|-----------------------------------|----------------------------------------|-------------------------------------|
| <b>2 weeks</b><br>N=317  | 107 (33.8)                | 80 (25.5)                         | 7 (2.2)                                | 20 (6.4)                            |
| <b>2 months</b><br>N=319 | 79 (24.8)                 | 62 (19.4)                         | 11 (3.4)                               | 7 (2.2)                             |
| <b>4 months</b><br>N=319 | 46 (14.4)                 | 36 (11.3)                         | 7 (2.2)                                | 4 (1.3)                             |
| <b>6 months</b><br>N=315 | 26 (8.3)                  | 18 (5.7)                          | 7 (2.2)                                | 1 (0.3)                             |

HM=human milk. Occasional=less than daily frequency. Top-ups=expressed HM provided immediately after feeding at the breast. Note: both daily expressed HM feeds and top-ups to were provided by 3 participants at 2 weeks and by 1 participant at 2 months.



For Study B participants (n=112), the mean breastfeeding self-efficacy score at two weeks postpartum was significantly lower among those using expressed HM [mean (Standard Deviation): 47.8 (13.6) vs. 58.6 (10.6);  $p < 0.001$ ].

Table 4 presents the associations between any use of expressed HM at two weeks postpartum and HM feeding outcomes. All multivariable regression models demonstrated goodness-of-fit based on the Hosmer-Lemeshow test ( $p > 0.05$ ) and area under the curve ( $> 0.7$ ). In the adjusted analyses, expressed HM use at two weeks postpartum was associated with cessation of HM feeding before six months (OR 2.66; 95% CI: 1.41-5.05) and with non-exclusive HM feeding to four months (OR 2.19; 95% CI: 1.16-4.14) and to six months (OR 3.65; 95% CI: 1.50-8.84). In-hospital formula supplementation was also associated with cessation of HM feeding before six months (OR 2.37; 95% CI 1.16-4.84) and non-exclusive HM feeding to four months (OR 4.46; 95% CI 2.47-8.02) and six months (OR 3.45; 95% CI 1.67-7.15). Other variables significantly associated with cessation of HM feeding were multiparity (OR 2.52; 95% CI 1.31-4.86), not having access to IBCLC visits through the CPNP (OR 2.21; 95% CI 1.08-4.52) and ethnicity ( $p = 0.02$ ). Participants of self-reported African origin were least likely to stop HM feeding before six months postpartum in comparison with all other ethnicity categories (Supplemental File 1). Ethnicity was not associated with exclusivity of HM feeding but education below post-secondary was associated with non-exclusive HM feeding for six months (OR 2.48; 95% CI 1.11-5.52).

**Table 4.** Multivariable logistic regression results: associations between expressed human milk use at two weeks postpartum and human milk feeding outcomes

| Model | Outcome<br>(sample size for unadjusted; adjusted)                                 | Odds Ratio (95% Confidence Intervals) |                  |                  |              |
|-------|-----------------------------------------------------------------------------------|---------------------------------------|------------------|------------------|--------------|
|       |                                                                                   | Unadjusted                            | p-value          | Adjusted         | p-value      |
| 1     | Cessation before 6 months<br>(N=309; N=296)                                       | 3.01 (1.69-5.35)                      | <b>&lt;0.001</b> | 2.66 (1.41-5.05) | <b>0.003</b> |
| 2     | Non-exclusive human milk<br>feeding post-discharge for 4<br>months (N=311; N=300) | 2.70 (1.51-4.84)                      | <b>0.001</b>     | 2.19 (1.16-4.14) | <b>0.016</b> |
| 3     | Non-exclusive human milk<br>feeding post-discharge for 6<br>months (N=310; N=299) | 4.00 (1.74-9.23)                      | <b>0.001</b>     | 3.65 (1.50-8.84) | <b>0.004</b> |

IBCLC=International Board Certified Lactation Consultant. Model 1 adjusted for parity, hospital formula, ethnicity and access to IBCLC services; Model 2 adjusted for hospital formula and ethnicity; Model 3 adjusted for hospital formula, ethnicity and post-secondary education.

These findings were consistent in the sensitivity analysis including only participants with term-born infants. In the subsample of participants with access to IBCLC services through the CPNP sites, expressed HM use at two weeks was associated with HM feeding cessation (OR 4.66; 95% CI 2.10-10.34) and non-exclusive HM feeding to six months (OR 3.44; 95% CI 1.12-10.61) in the multivariable regression models (Table 5). There was also an association with non-exclusive HM feeding to four months in unadjusted analysis but significance was not retained in the adjusted model (OR 1.50; 95% CI 0.69-3.28). There was no significant interaction between the number of IBCLC visits and use of expressed HM at two weeks postpartum in any of the models. However, not receiving an IBCLC visit compared with receipt of either 1 or >1 visit was an independent predictor of HM feeding cessation ( $p=0.003$ ). Receipt of >1 IBCLC visit compared with 1 visit was associated with non-exclusive HM feeding for six months (OR 3.74; 95% CI 1.35-10.31). These models demonstrated goodness-of-fit based on the Hosmer-Lemeshow test ( $p>0.05$ ) and area under the curve ( $>0.7$ ).

**Table 5.** Multivariable logistic regression results: associations between expressed human milk use at two weeks postpartum and human milk feeding outcomes in the subsample with access to IBCLC services through the CPNP

| Model | Outcome<br>(sample size for unadjusted; adjusted)                                 | Odds Ratio (95% Confidence Intervals) |              |                   |                  |
|-------|-----------------------------------------------------------------------------------|---------------------------------------|--------------|-------------------|------------------|
|       |                                                                                   | Unadjusted                            | p-value      | Adjusted          | p-value          |
| 4     | Cessation before 6 months<br>(N=234; N=231)                                       | 2.87 (1.43-5.74)                      | <b>0.003</b> | 4.66 (2.10-10.34) | <b>&lt;0.001</b> |
| 5     | Non-exclusive human milk<br>feeding post-discharge for 4<br>months (N=233; N=223) | 2.15 (1.08-4.27)                      | <b>0.028</b> | 1.50 (0.69-3.28)  | 0.305            |
| 6     | Non-exclusive human milk<br>feeding post-discharge for 6<br>months (N=234; N=229) | 4.55 (1.55-13.36)                     | <b>0.006</b> | 3.44 (1.12-10.61) | <b>0.031</b>     |

IBCLC=International Board Certified Lactation Consultant. Model 4 adjusted for parity and number of IBCLC visits; Model 5 adjusted for hospital formula, ethnicity and number of IBCLC visits; Model 6 adjusted for hospital formula and number of IBCLC visits.

## DISCUSSION

In this prospective study, expressed HM use was common in a multi-ethnic cohort of socially and economically vulnerable women with primarily term-born infants, with the highest prevalence at two weeks postpartum (34%). In adjusted analysis, use of expressed HM at two weeks postpartum, regardless of the intensity of use, was associated with cessation of any HM feeding before six months and with non-exclusive HM feeding to both four and six months postpartum. These findings demonstrate that early postpartum use of expressed HM may not support longer-term recommended HM feeding practices.

Prior studies have reported high rates of expressed HM use in high-income countries, with some evidence of lower rates among vulnerable women, such as those with lower education or income.[3, 8, 32] To our knowledge, the only other relevant Canadian data are from the Canadian Healthy Infant Longitudinal Development cohort study (n=2553), in which 55% of participants providing any HM at three months postpartum reported some expressed HM use; 74% continued breastfeeding for at least six months.[8] We found a similar rate of continued breastfeeding but a lower prevalence of expressed HM use. Further studies of expressed HM use in Canada and among vulnerable sub-populations are needed.

There are few prior studies examining the association between early postpartum expressed HM use and later HM feeding practices, and differences in study methods limit comparability. Rates of any and exclusive HM feeding also vary between studies. In an Australian cohort study, 46% of participants (n=914) provided expressed HM during the postpartum hospital stay and 68% were still providing some amount of HM at six months.[6] In adjusted analysis, not feeding exclusively at the breast in the first 24-48 hours predicted cessation of any and exclusive HM feeding before six months, but the specific association between expressed HM feeding and later practices was not assessed, and exclusive HM feeding referred to milk feeds only.[6] In an American study (n=946) in which 71% of participants

1  
2  
3 continued HM feeding for at least 12 weeks, expressing HM within the first three weeks postpartum  
4  
5 predicted HM feeding cessation by 12 weeks, while pumping after three weeks was protective of  
6  
7 continued HM feeding.[33] A pooled analysis of two cohort studies in Hong Kong (n=2450) found that  
8  
9 only exclusive use of expressed HM at one month postpartum predicted cessation of any HM feeding  
10  
11 before six months, and did not find a significant association with exclusive HM feeding in the adjusted  
12  
13 analysis.[16] However, “exclusive expressed HM” was determined by the proportion of HM feeds, not  
14  
15 all feeds, that were expressed HM, and use of formula or other milks was not reported. The rate of  
16  
17 continued HM feeding to six months was low in this study (29%), and by one month postpartum, 35% of  
18  
19 the sample had already stopped any HM feeding and were not included in the analysis.[16]  
20  
21  
22

23           Secondary analyses of the Infant Feeding Practices Study II in the United States found that  
24  
25 pumping before 1.5 months postpartum, regularly, and for non-elective reasons (such as difficulties  
26  
27 feeding at the breast or return to work) increased the risk of cessation of both any and exclusive HM  
28  
29 feeding.[14, 15] We did not collect data on reasons for expressed HM use, but based on the patterns we  
30  
31 observed, we hypothesize that our findings reflect the use of expressed HM as a strategy to manage the  
32  
33 early stages of lactation and suggest it may be a marker of difficulties feeding at the breast. This aligns  
34  
35 with our finding that breastfeeding self-efficacy scores were significantly lower among Study B  
36  
37 participants using expressed HM at two weeks postpartum. Other studies have found difficulties  
38  
39 feeding at the breast and concerns about milk supply to be commonly reported reasons for expressed  
40  
41 HM use during the hospital stay,[6, 34] and up to 4.5 months postpartum.[3, 4, 32] These are also the  
42  
43 most common reasons reported for early cessation of any and exclusive HM feeding.[35, 36] Using  
44  
45 expressed HM to address early lactation concerns may result in disruption to the establishment of a full  
46  
47 milk supply, which relies on frequent suckling and effective milk removal by the infant.[37] Use of a high  
48  
49 quality breast pump which mimics infant suckling may assist in this process, but this requires frequent  
50  
51 pumping sessions with full drainage of the breasts.[37] We also found that, in addition to expressed HM  
52  
53  
54  
55  
56  
57  
58  
59  
60

1  
2  
3 use, in-hospital formula supplementation and not having access to IBCLC services through the CPNP  
4  
5 predicted early cessation of HM feeding in our cohort.  
6

7  
8 Taken together, these findings reinforce long-standing guidance on the need for both hospitals  
9  
10 and community services to support women to successfully establish and maintain lactation through  
11  
12 prenatal preparation, access to skilled lactation support from birth, enhanced breastfeeding self-efficacy  
13  
14 and maternal mental health care.[33, 38-41]. These findings also suggest that breast pump provision  
15  
16 should be embedded within a larger framework of lactation education and skilled support to avoid or  
17  
18 reduce potential unintended negative influences on continued HM feeding. Explicit information on the  
19  
20 benefits and risks of pumping is currently lacking in Canadian infant feeding guidelines.[22]  
21  
22

23  
24 The findings have implications for strengthening the specific programs that provided the context  
25  
26 for this study, and beyond. Three-quarters of participants had access to free, in-home IBCLC visits for  
27  
28 postpartum lactation support and 72% of these did receive at least one visit. The results suggest this  
29  
30 specific localized intervention could be strengthened through greater focus on the establishment of  
31  
32 lactation, including prenatal preparation.[42] Maternal mental health care is also critical in this study  
33  
34 population, as immigrant women are at higher risk of postpartum depression.[43]  
35  
36

### 37 **Strengths and limitations**

38  
39  
40 Strengths of this study include prospective data collection at multiple time points over the first  
41  
42 six months postpartum with a short recall period to improve data accuracy.[44] Data collection included  
43  
44 the proportion of feeds that were expressed HM and the use of expressed HM as a top-up to feeding at  
45  
46 the breast, which provide more nuanced understanding of expressed HM feeding practices. There were  
47  
48 high recruitment and retention rates in both Study A and B, which we attribute to the embeddedness of  
49  
50 the lead researchers (AM and JF) in the weekly CPNP programs, which helped build trust and rapport  
51  
52 with vulnerable study participants.[45]  
53  
54  
55  
56  
57  
58  
59  
60

1  
2  
3 A limitation is that we did not collect data on pump ownership or use, which are needed for a  
4 full understanding of HM production and feeding practices.[46] We also did not assess participants'  
5 intentions regarding pump use or expressed HM feeding, reasons for providing expressed HM,  
6 experiences with lactation difficulties in the early postpartum period or employment status. Inclusion of  
7 these data is recommended for future studies. We were unable to include income or breastfeeding self-  
8 efficacy as potential covariates in our regression analyses as these data were not collected consistently  
9 between the two studies. The multivariable regression models assessing associations with HM feeding  
10 cessation and non-exclusive HM feeding for six months did not have room for all potential predictors  
11 identified in bivariate screening, while few predictors were identified for non-exclusive HM feeding for  
12 four months. Thus, we may not have identified or included all relevant covariates, although all models  
13 demonstrated goodness-of-fit. The findings are not generalizable to other CPNP sites or to the  
14 population in general, and all data were self-reported by participants. This introduces risk of recall and  
15 social desirability biases, which may have resulted in higher than actual rates of any and exclusive HM  
16 feeding. These biases were mitigated through the use of prospective data collection with a short recall  
17 period, rapport building with participants and collecting data on all infant feeding practices, not just HM.

## 38 CONCLUSION

39  
40  
41 In a multi-ethnic cohort of vulnerable women attending the CPNP at three sites in Toronto,  
42 expressed HM use was highest at two weeks postpartum, and this was associated with increased risk of  
43 early HM feeding cessation and non-exclusive HM feeding for four and six months postpartum. These  
44 findings suggest that feeding expressed HM in the early postpartum period may be a marker of lactation  
45 difficulties, but further research is needed to confirm this. The majority of study participants had access  
46 to free, in-home IBCLC visits through the participating CPNP sites, and this study provides insights to  
47 strengthen and tailor this intervention. A greater focus on prenatal preparation for lactation and access  
48  
49  
50  
51  
52  
53  
54  
55  
56  
57  
58  
59  
60

1  
2  
3 to skilled lactation support in the immediate postpartum period is recommended to assist in the  
4 establishment of effective feeding at the breast and to build breastfeeding self-efficacy in order to  
5  
6 enable women to achieve their HM feeding goals.  
7  
8  
9

## 10 **Author contributions**

11  
12 AM contributed to the design and conceptualization of the work, led implementation and data  
13 collection for Study B, conducted primary data analysis for this work, drafted the manuscript and  
14 finalized it for submission. JF contributed to the design and conceptualization of the work, led  
15 implementation and data collection for Study A, assisted with data analysis for this work and critically  
16 reviewed the manuscript. SS, BU, YN and CR facilitated the integration of research activities into the  
17 community CPNP programs and critically reviewed the manuscript. EDR contributed to the design and  
18 conceptualization of the work, including the designs of both Study A and B, and critically reviewed the  
19 manuscript. CLD contributed to the design and conceptualization of the work, including the design of  
20 Study B, and critically reviewed the manuscript. AK provided oversight to the statistical analysis and  
21 critically reviewed the manuscript. DLO and DWS gave oversight to the design and conceptualization of  
22 the study and to Study A and B, provided support for data collection and analysis, and critically reviewed  
23 the manuscript. All authors gave final approval of the manuscript.  
24  
25  
26  
27  
28  
29  
30  
31  
32  
33  
34  
35  
36  
37  
38  
39  
40

## 41 **Competing Interests**

42  
43  
44 None declared.  
45  
46  
47

## 48 **Acknowledgements**

49  
50  
51 The authors gratefully acknowledge the contribution of all study participants, and Yiqin Mao and  
52  
53 Stephanie Zhang for their assistance with recruitment and data collection.  
54  
55  
56  
57  
58  
59  
60

## Funding

This work was supported by a Canadian Institutes of Health Research Doctoral Research Award (#GSD-157928) to AM, and by The Sprott Foundation and the Joannah and Brian Lawson Centre for Child Nutrition. The graduate student stipend of JF was supported by an Ontario Graduate Scholarship and Peterborough K.M. Hunter Charitable Foundation Graduate Award. The funders had no role in the study design, data analysis, interpretation or drafting of the manuscript.

## Data sharing

The datasets generated and/or analyzed for this study are not publicly available in order to protect participant anonymity and confidentiality.

## Ethics statement

Ethics approval was obtained for Studies A and B from the Office of Research Ethics at the University of Toronto (protocol #34482 and #35845, respectively). Study B was also approved by the Research Ethics Board of Toronto Public Health (#2018-11). All participants provided written informed consent to participate.

## REFERENCES

1. World Health Organization. Global strategy for infant and young child feeding. Geneva: WHO, 2003. Available: [http://www.who.int/nutrition/publications/gs\\_infant\\_feeding\\_text\\_eng.pdf](http://www.who.int/nutrition/publications/gs_infant_feeding_text_eng.pdf) [Accessed 9 Nov 2016].
2. World Health Organization. Indicators for assessing infant and young child feeding practices: definitions and measurement methods. Geneva: WHO, 2021. Available: <https://www.who.int/publications/i/item/9789240018389> [Accessed April 22, 2021].
3. Labiner-Wolfe J, Fein SB, Shealy KR, et al. Prevalence of breast milk expression and associated factors. *Pediatrics* 2008;122 Suppl 2:S63-8. doi: 10.1542/peds.2008-1315h
4. Fan HSL, Fong DYT, Lok KYW, et al. Expressed breast milk feeding practices in Hong Kong Chinese women: A descriptive study. *Midwifery* 2020;91:102835. doi: 10.1016/j.midw.2020.102835



- 1  
2  
3 5. Binns CW, Win NN, Zhao Y, et al. Trends in the expression of breastmilk 1993-2003. *Breastfeeding*  
4 *Review* 2006;14(3):5-9.  
5
- 6 6. Forster DA, Johns HM, McLachlan HL, et al. Feeding infants directly at the breast during the  
7 postpartum hospital stay is associated with increased breastfeeding at 6 months postpartum: a  
8 prospective cohort study. *BMJ Open* 2015;5(5):e007512. doi: 10.1136/bmjopen-2014-007512  
9
- 10 7. Jiang B, Hua J, Wang Y, et al. Evaluation of the impact of breast milk expression in early postpartum  
11 period on breastfeeding duration: a prospective cohort study. *BMC Pregnancy Childbirth*  
12 2015;15:268. doi: 10.1186/s12884-015-0698-6  
13
- 14 8. Azad MB, Vehling L, Chan D, et al. Infant feeding and weight gain: separating breast milk from  
15 breastfeeding and formula from food. *Pediatrics* 2018;142(4):e20181092. doi: 10.  
16 542/peds.2018-1092  
17
- 18 9. Li R, Magadia J, Fein SB, et al. Risk of bottle-feeding for rapid weight gain during the first year of life.  
19 *Arch Pediatr Adolesc Med* 2012;166(5):431-36.  
20
- 21 10. Boone KM, Geraghty SR, Keim SA. Feeding at the breast and expressed milk feeding: associations  
22 with otitis media and diarrhea in infants. *J Pediatr* 2016;174:118-25. doi:  
23 10.1016/j.jpeds.2016.04.006  
24
- 25 11. Noel-Weiss J, Boersma S, Kujawa-Myles S. Questioning current definitions for breastfeeding  
26 research. *Int Breastfeed J* 2012;7(9). doi: 10.1186/1746-4358-7-9  
27
- 28 12. Rasmussen KM, Felice JP, O'Sullivan EJ, et al. The meaning of "breastfeeding" is changing and so  
29 must our language about it. *Breastfeed Med* 2017;12(9):510-14. doi: 10.1089/bfm.2017.0073  
30
- 31 13. Johns HM, Forster DA, Amir LH, et al. Prevalence and outcomes of breast milk expressing in women  
32 with healthy term infants: a systematic review. *BMC Pregnancy Childbirth* 2013;13:212. doi:  
33 10.1186/1471-2393-13-212  
34
- 35 14. Felice JP, Cassano PA, Rasmussen KM. Pumping human milk in the early postpartum period: its  
36 impact on long-term practices for feeding at the breast and exclusively feeding human milk in a  
37 longitudinal survey cohort. *Am J Clin Nutr* 2016;103(5):1267-77. doi: 10.3945/ajcn.115.115733  
38
- 39 15. Yourkavitch J, Rasmussen KM, Pence BW, et al. Early, regular breast-milk pumping may lead to early  
40 breast-milk feeding cessation. *Public Health Nutr* 2018;21(9):1726-36. doi:  
41 10.1017/S1368980017004281  
42
- 43 16. Bai DL, Fong DY, Lok KY, et al. Practices, predictors and consequences of expressed breast-milk  
44 feeding in healthy full-term infants. *Public Health Nutr* 2017;20(3):492-503. doi:  
45 10.1017/S136898001600241X  
46
- 47 17. Public Health Agency of Canada. Canada Prenatal Nutrition Program (CPNP). Ottawa: PHAC, 2020.  
48 Available: [https://www.canada.ca/en/public-health/services/health-promotion/childhood-](https://www.canada.ca/en/public-health/services/health-promotion/childhood-adolescence/programs-initiatives/canada-prenatal-nutrition-program-cpnp.html)  
49 [adolescence/programs-initiatives/canada-prenatal-nutrition-program-cpnp.html](https://www.canada.ca/en/public-health/services/health-promotion/childhood-adolescence/programs-initiatives/canada-prenatal-nutrition-program-cpnp.html) [Accessed 19  
50 Oct 2020].  
51
- 52 18. Francis J, Mildon A, Stewart S, et al. Breastfeeding rates are high in a prenatal community support  
53 program targeting vulnerable women and offering enhanced postnatal lactation support: a  
54 prospective cohort study. *Int J Equity Health* 2021;20(1):71. doi: 10.1186/s12939-021-01386-6  
55  
56  
57  
58  
59

19. Mildon A, Francis J, Stewart S, et al. Effect on breastfeeding practices of providing in-home lactation support to vulnerable women through the Canada Prenatal Nutrition Program: protocol for a pre/post intervention study. *Int Breastfeed J* 2021;16:49. doi: 10.1186/s13006-021-00396-y
20. Francis J, Unger S, Bando N, et al. Postdischarge feeding of very-low-birth-weight infants: adherence to nutrition guidelines. *J Pediatr Gastroenterol Nutr* 2018;67(3):401-08. doi: 10.1097/MPG.0000000000002041
21. O'Connor DL, Khan S, Weishuhn K, et al. Growth and nutrient intakes of human milk-fed preterm infants provided with extra energy and nutrients after hospital discharge. *Pediatrics* 2008;121(4):766-76. doi: 10.1542/peds.2007-0054
22. Health Canada, Canadian Pediatric Society, Dietitians of Canada and Breastfeeding Committee for Canada. Nutrition for healthy term infants: recommendations from birth to six months. Ottawa: Health Canada, 2014. Available: <https://www.canada.ca/en/health-canada/services/food-nutrition/healthy-eating/infant-feeding/nutrition-healthy-term-infants-recommendations-birth-six-months.html> [Accessed 20 Nov 2017].
23. Semenic S, Loiselle C, Gottlieb L. Predictors of the duration of exclusive breastfeeding among first-time mothers. *Res Nurs Health* 2008;31(5):428-41.
24. Omand JA, Carsley S, Darling PB, et al. Evaluating the accuracy of a geographic closed-ended approach to ethnicity measurement, a practical alternative. *Ann Epidemiol* 2014;24(4):246-53. doi: 10.1016/j.annepidem.2013.12.015
25. Shapiro-Mendoza CK, Lackritz EM. Epidemiology of late and moderate preterm birth. *Semin Fetal Neonatal* 2012;17(3):120-5.
26. Statistics Canada. Table 11-10-0241-01. Low income cut-offs (LICOs) before and after tax by community size and family size, in current dollars. Ottawa: Statistics Canada, 2020. Available: <https://www150.statcan.gc.ca/t1/tbl1/en/tv.action?pid=1110024101> [Accessed 16 July 2020].
27. Statistics Canada. Employment Insurance Coverage Survey – 2018. Ottawa, Canada: Statistics Canada; 2018. Available: [https://www23.statcan.gc.ca/imdb/p3Instr.pl?Function=assembleInstr&lang=en&Item\\_Id=494316#qb367084](https://www23.statcan.gc.ca/imdb/p3Instr.pl?Function=assembleInstr&lang=en&Item_Id=494316#qb367084) [Accessed 7 Jan 2019].
28. Health Canada. Canadian Community Health Survey cycle 2.2, nutrition (2004) - Income-related household food security in Canada. Ottawa: Health Canada, 2007. Available: [https://www.canada.ca/content/dam/hc-sc/migration/hc-sc/fn-an/alt\\_formats/hpfb-dgpsa/pdf/surveill/income\\_food\\_sec-sec\\_alim-eng.pdf](https://www.canada.ca/content/dam/hc-sc/migration/hc-sc/fn-an/alt_formats/hpfb-dgpsa/pdf/surveill/income_food_sec-sec_alim-eng.pdf) [Accessed 31 Oct 2017].
29. Health Canada. Determining food security status. Ottawa: Government of Canada, 2020. Available: <https://www.canada.ca/en/health-canada/services/food-nutrition/food-nutrition-surveillance/health-nutrition-surveys/canadian-community-health-survey-cchs/household-food-insecurity-canada-overview/determining-food-security-status-food-nutrition-surveillance-health-canada.html> [Accessed 3 Nov 2020].
30. Dennis CL. The Breastfeeding Self-Efficacy Scale: Psychometric assessment of the Short Form. *J Obstet Gynecol Neonatal Nurs* 2003;32(6):734-44. doi: 10.1177/0884217503258459

- 1  
2  
3 31. Mildon A, Francis J, Stewart S, et al. High levels of breastmilk feeding despite a low rate of exclusive  
4 breastfeeding for six months in a cohort of vulnerable women in Toronto, Canada. *Matern Child*  
5 *Nutr* 2022;18(1):e13260. doi: 10.1111/mcn.13260  
6
- 7 32. Pang WW, Bernard JY, Thavamani G, et al. Direct vs. expressed breast milk feeding: relation to  
8 duration of breastfeeding. *Nutrients* 2017;9(6). doi: 10.3390/nu9060547  
9
- 10 33. Schwartz K, D'Arcy HJS, Gillespie B, et al. Factors associated with weaning in the first 3 months  
11 postpartum. *J Fam Pract* 2002;51(5):439-44.  
12
- 13 34. Loewenberg Weisband Y, Keim SA, Keder LM, et al. Early breast milk pumping intentions among  
14 postpartum women. *Breastfeed Med* 2017;12:28-32. doi: 10.1089/bfm.2016.0142  
15
- 16 35. Odom EC, RLi R, Scanlon KS, et al. Reasons for earlier than desired cessation of breastfeeding.  
17 *Pediatrics* 2013;131:e726-e32.  
18
- 19 36. Gatti L. Maternal perceptions of insufficient milk supply in breastfeeding. *J Nurs Scholarsh*  
20 2008;40(4):355-63.  
21
- 22 37. Kent JC, Prime DK, Garbin CP. Principles for maintaining or increasing breast milk production. *J*  
23 *Obstet Gynecol Neonatal Nurs* 2012;41(1):114-21. doi: 10.1111/j.1552-6909.2011.01313.x  
24
- 25 38. World Health Organization. Evidence for the ten steps to successful breastfeeding. Geneva: WHO,  
26 1998. Available:  
27 [http://apps.who.int/iris/bitstream/handle/10665/43633/9241591544\\_eng.pdf;jsessionid=220F8](http://apps.who.int/iris/bitstream/handle/10665/43633/9241591544_eng.pdf;jsessionid=220F8D9CA6C3BE610A529B8EDB4F2595?sequence=1)  
28 [D9CA6C3BE610A529B8EDB4F2595?sequence=1](http://apps.who.int/iris/bitstream/handle/10665/43633/9241591544_eng.pdf;jsessionid=220F8D9CA6C3BE610A529B8EDB4F2595?sequence=1) [Accessed 20 July 2016].  
29
- 30 39. Perez-Escamilla R, Martinez JL, Segura-Perez S. Impact of the Baby-friendly Hospital Initiative on  
31 breastfeeding and child health outcomes: a systematic review. *Matern Child Nutr* 2016 doi:  
32 10.1111/mcn.12294  
33
- 34 40. World Health Organization. Guideline: counselling of women to improve breastfeeding practices.  
35 Geneva: WHO, 2018. Available:  
36 <https://apps.who.int/iris/bitstream/handle/10665/280133/9789241550468-eng.pdf?ua=1>  
37 [Accessed 22 Oct 2019].  
38
- 39 41. Dias CC, Figueiredo B. Breastfeeding and depression: a systematic review of the literature. *J Affect*  
40 *Disord* 2015;171:142-54. doi: 10.1016/j.jad.2014.09.022  
41
- 42 42. Francis J, Mildon A, Stewart S, et al. Vulnerable mothers' experiences breastfeeding with an  
43 enhanced community lactation support program. *Matern Child Nutr* 2020;16(3):e12957. doi:  
44 10.1111/mcn.12957  
45
- 46 43. Falah-Hassani K, Shiri R, Vigod S, et al. Prevalence of postpartum depression among immigrant  
47 women: A systematic review and meta-analysis. *J Psychiatr Res* 2015;70:67-82. doi:  
48 10.1016/j.jpsychires.2015.08.010  
49
- 50 44. Li R, Scanlon KS, Serdula MK. The Validity and Reliability of Maternal Recall of Breastfeeding Practice.  
51 *Nutr Rev* 2005;63(4):103-10. doi: 10.1111/j.1753-4887.2005.tb00128.x  
52
- 53 45. Barnett J, Aguilar S, Brittner M, et al. Recruiting and retaining low-income, multi-ethnic women into  
54 randomized controlled trials: successful strategies and staffing. *Contemp Clinl Trials*  
55 2012;33(5):925-32. doi: 10.1016/j.cct.2012.06.005  
56  
57  
58  
59

1  
2  
3 46. Felice JP, Rasmussen KM. Breasts, pumps and bottles, and unanswered questions. *Breastfeed Med*  
4 2015;10(9) doi: 10.1089/bfm.2015.0107  
5  
6  
7

8  
9 **List of figures**

10  
11 Figure 1. Participant flow diagram  
12

13 **Supplemental file**

14  
15 Supplemental Table 1. Multivariable logistic regression analysis: between-category comparison for  
16 association between ethnicity and cessation of any human milk feeding by 6 months postpartum  
17  
18  
19  
20  
21  
22  
23  
24  
25  
26  
27  
28  
29  
30  
31  
32  
33  
34  
35  
36  
37  
38  
39  
40  
41  
42  
43  
44  
45  
46  
47  
48  
49  
50  
51  
52  
53  
54  
55  
56  
57  
58  
59  
60

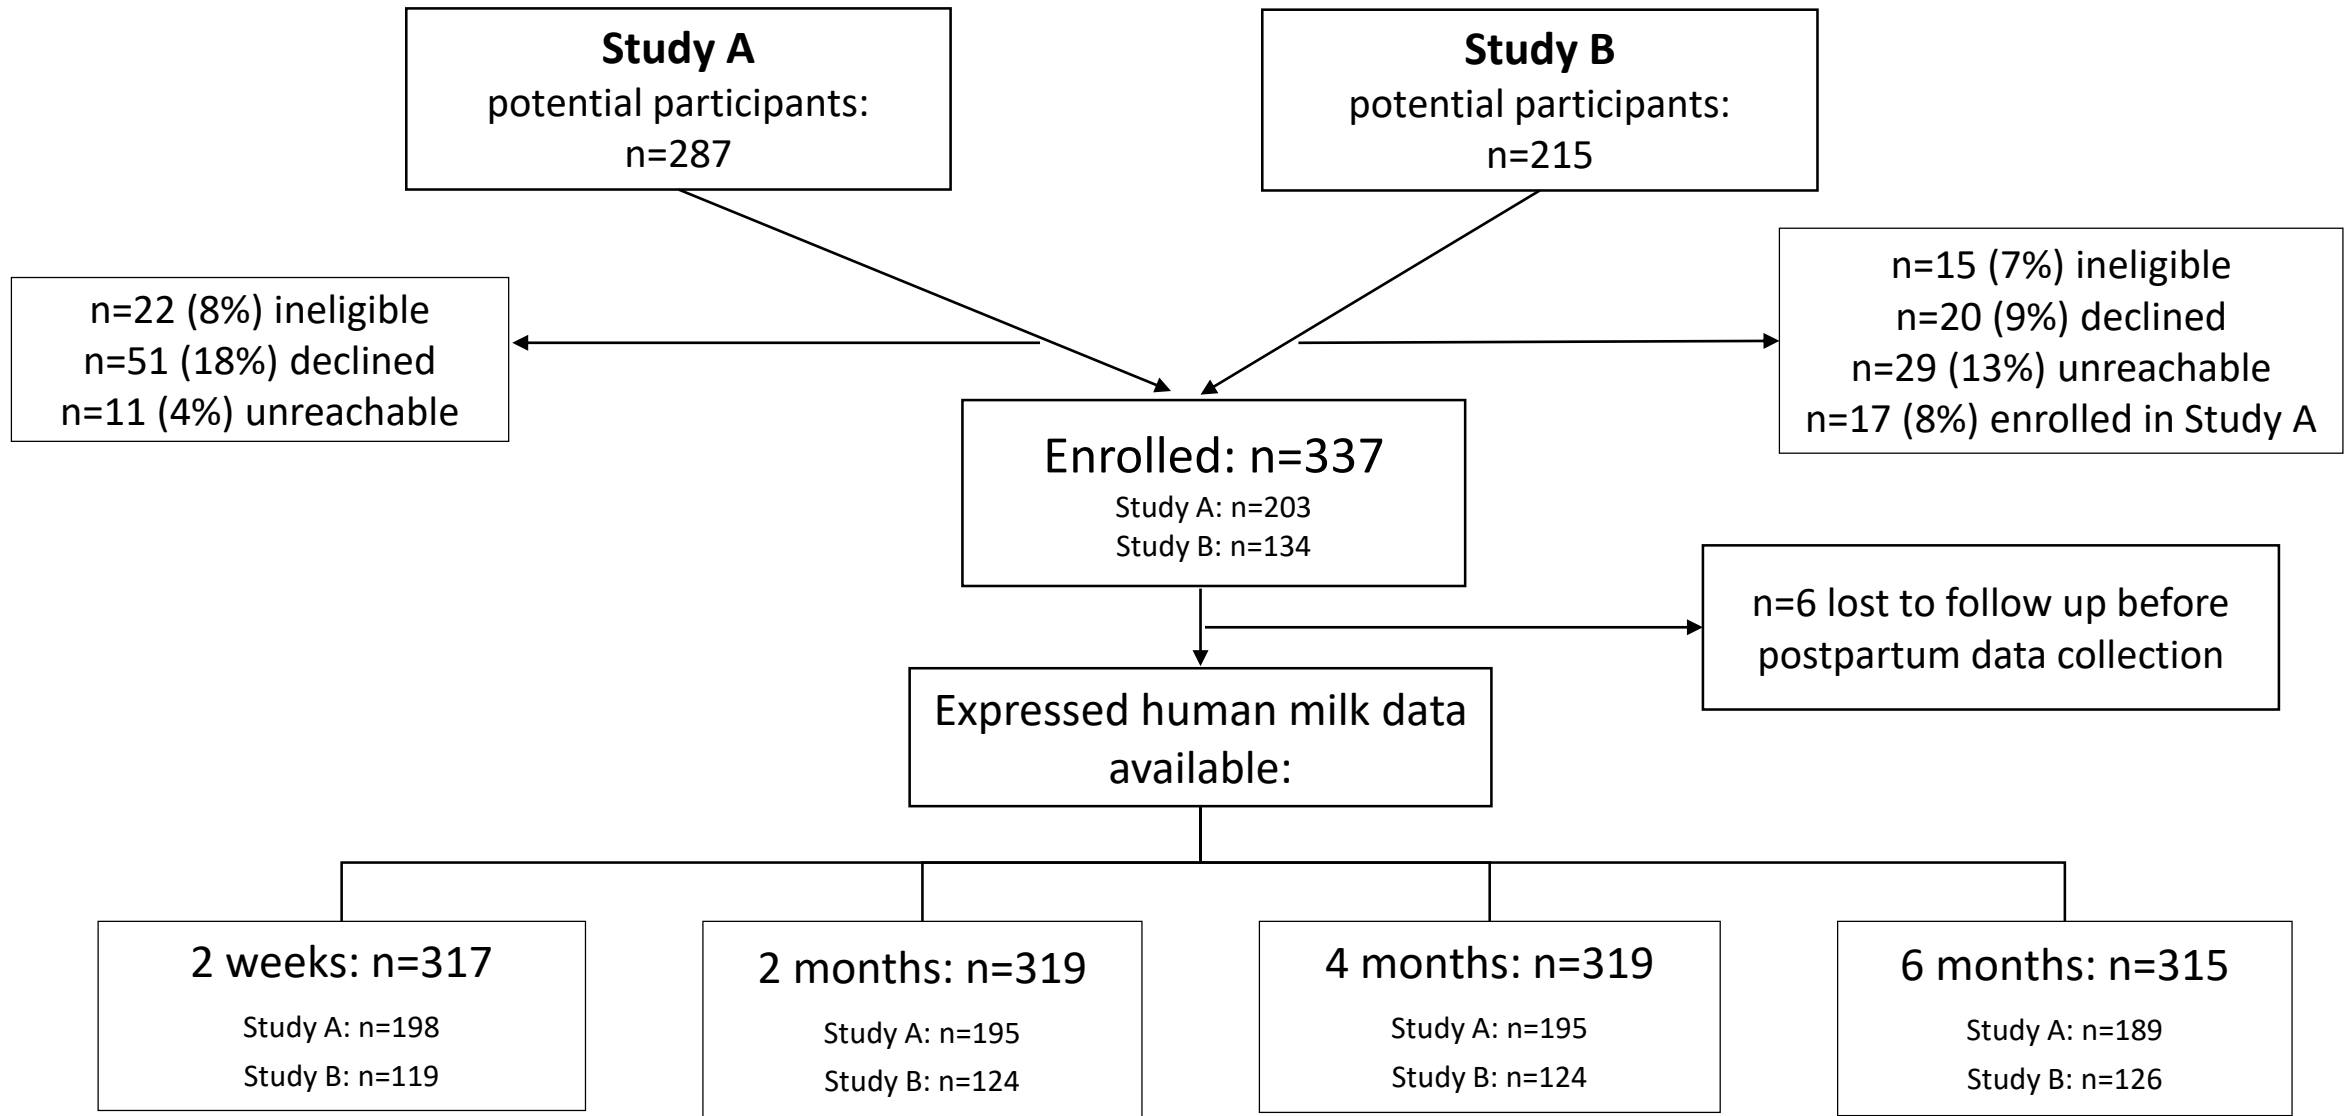

1  
2  
3  
4  
5  
6  
7  
8  
9  
10  
11  
12  
13  
14  
15  
16  
17  
18  
19  
20  
21  
22  
23  
24  
25  
26  
27  
28  
29  
30  
31  
32  
33  
34  
35  
36  
37  
38  
39  
40  
41

**Supplemental Table 1.** Multivariable logistic regression analysis: between-category comparison for association between ethnicity and cessation of any human milk feeding by 6 months postpartum.

| Ethnicity category*      | Adjusted Odds Ratio (95% Confidence Intervals) | p-value |
|--------------------------|------------------------------------------------|---------|
| East Asian               | 5.03 (1.06-23.92)                              | 0.042   |
| Other Asian              | 6.43 (1.17-35.43)                              | 0.033   |
| European/Caribbean/Other | 14.42 (2.63-78.97)                             | 0.002   |
| Latin American           | 9.48 (1.82-49.53)                              | 0.008   |

\*Reference category: African ethnicity.

Model adjusted for expressed human milk use at two weeks postpartum, parity, hospital formula, and access to IBCLC services through the CPNP.

IBCLC=International Board Certified Lactation Consultant; CPNP=Canada Prenatal Nutrition Program.

**STROBE 2007 (v4) checklist of items to be included in reports of observational studies in epidemiology\***  
**Checklist for cohort, case-control, and cross-sectional studies (combined)**

| Section/Topic             | Item # | Recommendation                                                                                                                                                                                                                                                                                                                                                                                                                                                         | Reported on page # |
|---------------------------|--------|------------------------------------------------------------------------------------------------------------------------------------------------------------------------------------------------------------------------------------------------------------------------------------------------------------------------------------------------------------------------------------------------------------------------------------------------------------------------|--------------------|
| Title and abstract        | 1      | (a) Indicate the study's design with a commonly used term in the title or the abstract                                                                                                                                                                                                                                                                                                                                                                                 | 1                  |
|                           |        | (b) Provide in the abstract an informative and balanced summary of what was done and what was found                                                                                                                                                                                                                                                                                                                                                                    | 1                  |
| <b>Introduction</b>       |        |                                                                                                                                                                                                                                                                                                                                                                                                                                                                        |                    |
| Background/rationale      | 2      | Explain the scientific background and rationale for the investigation being reported                                                                                                                                                                                                                                                                                                                                                                                   | 2-3                |
| Objectives                | 3      | State specific objectives, including any pre-specified hypotheses                                                                                                                                                                                                                                                                                                                                                                                                      | 3                  |
| <b>Methods</b>            |        |                                                                                                                                                                                                                                                                                                                                                                                                                                                                        |                    |
| Study design              | 4      | Present key elements of study design early in the paper                                                                                                                                                                                                                                                                                                                                                                                                                | 4                  |
| Setting                   | 5      | Describe the setting, locations, and relevant dates, including periods of recruitment, exposure, follow-up, and data collection                                                                                                                                                                                                                                                                                                                                        | 4-5                |
| Participants              | 6      | (a) <i>Cohort study</i> —Give the eligibility criteria, and the sources and methods of selection of participants. Describe methods of follow-up<br><i>Case-control study</i> —Give the eligibility criteria, and the sources and methods of case ascertainment and control selection. Give the rationale for the choice of cases and controls<br><i>Cross-sectional study</i> —Give the eligibility criteria, and the sources and methods of selection of participants | 4-5                |
|                           |        | (b) <i>Cohort study</i> —For matched studies, give matching criteria and number of exposed and unexposed<br><i>Case-control study</i> —For matched studies, give matching criteria and the number of controls per case                                                                                                                                                                                                                                                 | n/a                |
| Variables                 | 7      | Clearly define all outcomes, exposures, predictors, potential confounders, and effect modifiers. Give diagnostic criteria, if applicable                                                                                                                                                                                                                                                                                                                               | 6-9                |
| Data sources/ measurement | 8*     | For each variable of interest, give sources of data and details of methods of assessment (measurement). Describe comparability of assessment methods if there is more than one group                                                                                                                                                                                                                                                                                   | 5-7                |
| Bias                      | 9      | Describe any efforts to address potential sources of bias                                                                                                                                                                                                                                                                                                                                                                                                              | 5, 16-17           |
| Study size                | 10     | Explain how the study size was arrived at                                                                                                                                                                                                                                                                                                                                                                                                                              | 9                  |
| Quantitative variables    | 11     | Explain how quantitative variables were handled in the analyses. If applicable, describe which groupings were chosen and why                                                                                                                                                                                                                                                                                                                                           | 8-9                |
| Statistical methods       | 12     | (a) Describe all statistical methods, including those used to control for confounding                                                                                                                                                                                                                                                                                                                                                                                  | 8-9                |
|                           |        | (b) Describe any methods used to examine subgroups and interactions                                                                                                                                                                                                                                                                                                                                                                                                    | 9                  |
|                           |        | (c) Explain how missing data were addressed                                                                                                                                                                                                                                                                                                                                                                                                                            | 8                  |
|                           |        | (d) <i>Cohort study</i> —If applicable, explain how loss to follow-up was addressed<br><i>Case-control study</i> —If applicable, explain how matching of cases and controls was addressed                                                                                                                                                                                                                                                                              | n/a                |

|                          |     |                                                                                                                                                                                                              |                |
|--------------------------|-----|--------------------------------------------------------------------------------------------------------------------------------------------------------------------------------------------------------------|----------------|
|                          |     | <i>Cross-sectional study</i> —If applicable, describe analytical methods taking account of sampling strategy                                                                                                 |                |
|                          |     | (e) Describe any sensitivity analyses                                                                                                                                                                        | n/a            |
| <b>Results</b>           |     |                                                                                                                                                                                                              |                |
| Participants             | 13* | (a) Report numbers of individuals at each stage of study—eg numbers potentially eligible, examined for eligibility, confirmed eligible, included in the study, completing follow-up, and analysed            | 9/Fig 1        |
|                          |     | (b) Give reasons for non-participation at each stage                                                                                                                                                         | 9/Fig 1        |
|                          |     | (c) Consider use of a flow diagram                                                                                                                                                                           | Fig 1          |
| Descriptive data         | 14* | (a) Give characteristics of study participants (eg demographic, clinical, social) and information on exposures and potential confounders                                                                     | 9-11           |
|                          |     | (b) Indicate number of participants with missing data for each variable of interest                                                                                                                          | Tables p.10-14 |
|                          |     | (c) <i>Cohort study</i> —Summarise follow-up time (eg, average and total amount)                                                                                                                             | 9/Fig 1        |
| Outcome data             | 15* | <i>Cohort study</i> —Report numbers of outcome events or summary measures over time                                                                                                                          | 11             |
|                          |     | <i>Case-control study</i> —Report numbers in each exposure category, or summary measures of exposure                                                                                                         |                |
|                          |     | <i>Cross-sectional study</i> —Report numbers of outcome events or summary measures                                                                                                                           |                |
| Main results             | 16  | (a) Give unadjusted estimates and, if applicable, confounder-adjusted estimates and their precision (eg, 95% confidence interval). Make clear which confounders were adjusted for and why they were included | 13-14          |
|                          |     | (b) Report category boundaries when continuous variables were categorized                                                                                                                                    | n/a            |
|                          |     | (c) If relevant, consider translating estimates of relative risk into absolute risk for a meaningful time period                                                                                             | n/a            |
| Other analyses           | 17  | Report other analyses done—eg analyses of subgroups and interactions, and sensitivity analyses                                                                                                               | 12-14          |
| <b>Discussion</b>        |     |                                                                                                                                                                                                              |                |
| Key results              | 18  | Summarise key results with reference to study objectives                                                                                                                                                     | 14             |
| Limitations              | 19  | Discuss limitations of the study, taking into account sources of potential bias or imprecision. Discuss both direction and magnitude of any potential bias                                                   | 16-17          |
| Interpretation           | 20  | Give a cautious overall interpretation of results considering objectives, limitations, multiplicity of analyses, results from similar studies, and other relevant evidence                                   | 17             |
| Generalisability         | 21  | Discuss the generalisability (external validity) of the study results                                                                                                                                        | 17             |
| <b>Other information</b> |     |                                                                                                                                                                                                              |                |
| Funding                  | 22  | Give the source of funding and the role of the funders for the present study and, if applicable, for the original study on which the present article is based                                                | 18             |

\*Give information separately for cases and controls in case-control studies and, if applicable, for exposed and unexposed groups in cohort and cross-sectional studies.

**Note:** An Explanation and Elaboration article discusses each checklist item and gives methodological background and published examples of transparent reporting. The STROBE checklist is best used in conjunction with this article (freely available on the Web sites of PLoS Medicine at <http://www.plosmedicine.org/>, Annals of Internal Medicine at <http://www.annals.org/>, and Epidemiology at <http://www.epidem.com/>). Information on the STROBE Initiative is available at [www.strobe-statement.org](http://www.strobe-statement.org).
